1 **A chemoproteomic portrait of the oncometabolite fumarate**

2

3 Rhushikesh A. Kulkarni,<sup>1,8</sup> Daniel W. Bak,<sup>2,8</sup> Darmood Wei,<sup>3</sup> Sarah E. Bergholtz,<sup>1</sup> Chloe A. Briney,<sup>1</sup>  
4 Jonathan H. Shrimp,<sup>1</sup> Abigail L. Thorpe,<sup>1</sup> Arissa Bavari,<sup>1</sup> Aktan Alpsoy,<sup>4</sup> Michaella Levy,<sup>5</sup> Laurence  
5 Florens,<sup>5</sup> Michael P. Washburn,<sup>5,6</sup> Emily C. Dykhuizen,<sup>4</sup> Norma Frizzell,<sup>7</sup> Eranthie Weerapana,<sup>2</sup> W.  
6 Marston Linehan,<sup>3</sup> Jordan L. Meier<sup>1,9</sup>

7

8 1. Chemical Biology Laboratory, Center for Cancer Research, National Cancer Institute, National  
9 Institutes of Health, Frederick, MD, 21702, USA.

10

11 2. Department of Chemistry, Boston College, Chestnut Hill MA, 02467, USA.

12

13 3. Urologic Oncology Branch, Center for Cancer Research, National Cancer Institute, National  
14 Institutes of Health, Bethesda, MD, 20817, USA.

15

16 4. Department of Medicinal Chemistry and Molecular Pharmacology, College of Pharmacy, Purdue  
17 University, West Lafayette IN, 47906, USA.

18

19 5. Stowers Institute for Medical Research, Kansas City, MO, 64110, USA

20

21 6. Department of Pathology and Laboratory Medicine, University of Kansas Medical Center, Kansas  
22 City, KS, 66160, USA

23

24 7. Department of Pharmacology, Physiology and Neuroscience, School of Medicine, University of  
25 South Carolina, Columbia, SC, 29209, USA.

26

27 8. These authors contributed equally to this work.

28

29 9. Lead contact to whom correspondence should be addressed: [jordan.meier@nih.gov](mailto:jordan.meier@nih.gov)

30

1 **Abstract**

2 Hereditary cancer disorders often provide an important window into novel mechanisms supporting  
3 tumor growth and survival. Understanding these mechanisms and developing biomarkers to identify  
4 their presence thus represents a vital goal. Towards this goal, here we report a chemoproteomic  
5 map of the covalent targets of fumarate, an oncometabolite whose accumulation marks the genetic  
6 cancer predisposition syndrome hereditary leiomyomatosis and renal cell carcinoma (HLRCC). First,  
7 we validate the ability of known and novel chemoproteomic probes to report on fumarate reactivity  
8 in vitro. Next, we apply these probes in concert with LC-MS/MS to identify cysteine residues sensitive  
9 to either fumarate treatment or fumarate hydratase (*FH*) mutation in untransformed and human  
10 HLRCC cell models, respectively. Mining this data to understand the structural determinants of  
11 fumarate reactivity reveals an unexpected anti-correlation with nucleophilicity, and the discovery of  
12 a novel influence of pH on fumarate-cysteine interactions. Finally, we show that many fumarate-  
13 sensitive and *FH*-regulated cysteines are found in functional protein domains, and perform  
14 mechanistic studies of a fumarate-sensitive cysteine in SMARCC1 that lies at a key protein-protein  
15 interface in the SWI-SNF tumor suppressor complex. Our studies provide a powerful resource for  
16 understanding the influence of fumarate on reactive cysteine residues, and lay the foundation for  
17 future efforts to exploit this distinct aspect of oncometabolism for cancer diagnosis and therapy.

## 1 **Introduction**

2

3 A major finding of modern cancer genomics has been the unexpected discovery of driver mutations  
4 in primary metabolic enzymes.<sup>1-5</sup> Many of these lesions cause the characteristic accumulation of  
5 “oncometabolites,” endogenous metabolites whose accretion can directly drive malignant  
6 transformation.<sup>6</sup> For example, mutation of fumarate hydratase (*FH*) in the familial cancer  
7 susceptibility syndrome hereditary leiomyomatosis and renal cell carcinoma (HLRCC) leads to high  
8 levels of intracellular fumarate.<sup>7-8</sup> Fumarate has been hypothesized to promote tumorigenesis both  
9 by reversibly inhibiting dioxygenases involved in epigenetic signaling,<sup>9-14</sup> as well as by interacting  
10 with proteins covalently as an electrophile, forming the non-enzymatic posttranslational modification  
11 cysteine S-succination (Fig. 1).<sup>15-16</sup> This latter mechanism is unique to fumarate, and has been  
12 proposed to contribute to the distinct tissue selectivity, gene expression profiles, and clinical  
13 outcomes observed in HLRCC relative to other oncometabolite-driven cancers.<sup>17-18</sup> Consistent with  
14 a functional role, recent studies have found that S-succination of Keap1 can activate NRF2-mediated  
15 transcription in HLRCC.<sup>19</sup> Furthermore, global immunohistochemical staining of S-succination has  
16 been applied to assess stage and progression of FH-deficient tumors,<sup>20</sup> suggesting the utility of this  
17 modification as a biomarker.

18

19 Despite its potential relevance to HLRCC pathology, our overall understanding of fumarate’s  
20 covalent reactivity remains incomplete. Cysteine S-succination antibodies are not commercially  
21 available, and those developed have not yet proven useful for immunoprecipitation.<sup>21</sup> This has limited  
22 our current knowledge of S-succination to proteins identified by candidate methods, such as Keap1,<sup>19</sup>  
23 or whole proteome mass spectrometry,<sup>22-25</sup> which is biased towards the identification of abundant  
24 proteins. In addition, neither of these approaches report on the extent of S-succination, impeding our  
25 ability to understand what structural interactions drive fumarate’s covalent reactivity, as well as  
26 whether these modifications significantly alter protein function. Thus, a better understanding of the

1 global scope and stoichiometry of fumarate reactivity has the potential to provide new insights into  
2 HLRCC biology, as well as site-specific biomarkers for assessing tumor development and  
3 therapeutic response.

4

5 Towards this goal, here we report a chemoproteomic map of the covalent targets of the HLRCC  
6 oncometabolite fumarate. First, we establish the utility of chemoproteomic probes to report on  
7 concentration-dependent fumarate reactivity in vitro. Next, we apply these probes in combination  
8 with quantitative mass spectrometry to define the proteome-wide sensitivity of cysteine residues to  
9 either fumarate treatment or fumarate hydratase (*FH*) mutation. Analyzing this data to understand  
10 the molecular determinants of fumarate-sensitivity leads to the discovery of an unanticipated anti-  
11 correlation with cysteine nucleophilicity, and highlights a distinct impact of pH on the reactivity of this  
12 oncometabolite. Finally, we demonstrate that fumarate-sensitive and *FH*-regulated cysteines lie in  
13 many functional protein domains, and perform functional analyses of a fumarate-sensitive cysteine  
14 in SMARCC1, a member of the SWI-SNF tumor suppressor complex. Our studies provide a novel  
15 resource for understanding how fumarate reactivity impacts HLRCC biology, as well as an essential  
16 underpinning for diagnostic and therapeutic applications seeking to exploit this unique aspect of  
17 oncometabolism for clinical benefit.

18

## 19 **Results**

20

### 21 *Comparative affinity-based profiling of physiological fumarate reactivity*

22

23 Several recent studies have demonstrated the feasibility and power of applying reactivity-based  
24 chemoproteomics to characterize electrophilic drug targets.<sup>26-29</sup> In order to extend these methods to  
25 the endogenous oncometabolite fumarate, we first sought to establish a physiological range for  
26 fumarate reactivity in complex proteomes. Several pieces of evidence imply that fumarate may



1 exhibit relatively modest reactivity compared to other chemical electrophiles. Most relevantly, two  
2 recent analyses of the multiple sclerosis drug dimethyl fumarate (Tecfidera; DMF) found its  
3 metabolized product monomethyl fumarate (MMF) possesses limited thiol reactivity at micromolar  
4 concentrations.<sup>30-31</sup> Theoretical calculations indicate this stems from MMF's higher-lying LUMO,  
5 which increases the energetic barrier to covalent bond formation with nucleophilic cysteines.<sup>31</sup> Of  
6 note, fumarate's LUMO is even higher in energy than MMF (Fig. S1a), suggesting it may possess a  
7 distinct reactivity profile relative to Tecfidera. Further, it raises the question as to whether fumarate  
8 normally functions as a covalent metabolite, or does so only upon hyperaccumulation caused by  
9 pathophysiological stimuli such as *FH* mutation.

10  
11 To explore this phenomenon, we treated cell lysates from human embryonic kidney (HEK-293) cells  
12 with increasing amounts of fumarate and analyzed proteins for covalent labeling using an S-  
13 succination antibody (Fig. 1b). An equal amount of proteome from the UOK262 HLRCC cell line (*FH*-  
14 *-*) was used to compare levels of S-succination caused by *FH* mutation. Control studies verified the  
15 S-succination signal in these cells was dependent on *FH* mutational status (Fig. S1b). In contrast to  
16 its esterified analogues fumarate is a relatively mild electrophile, requiring millimolar concentrations  
17 to manifest substantial protein labeling (Fig. 1b). Treatment of proteomes with 2.5 mM fumarate  
18 caused near equivalent S-succination to that observed in *FH*-/- cell lines, consistent with previous  
19 reports suggesting fumarate accumulates to millimolar levels in HLRCC.<sup>8</sup> Since antibodies can  
20 possess unanticipated cross reactivity and limited linear range, we devised an orthogonal chemical  
21 strategy to study fumarate's covalent labeling using a clickable chemotype mimic, fumarate alkyne  
22 (FA-alkyne, Fig. 1c). FA-alkyne labeling occurred at slightly lower concentrations than fumarate-  
23 dependent S-succination in proteomes, potentially indicating the analogue's heightened reactivity  
24 due to its lower LUMO energy (Fig. S1c). However, consistent with covalent labeling through a  
25 Michael addition mechanism, we observed time- and dose-dependent protein labeling upon  
26 incubation of lysates with FA-alkyne, but not the inert analogue succinate alkyne (Fig. S1d-e). FA-

1 alkyne labeling was modestly competed by fumarate, but was completely abrogated by pre-  
2 incubation with MMF and DMF, again highlighting the attenuated reactivity of the oncometabolite  
3 relative to these molecules (Fig. S1f). Finally, we assessed fumarate's reactivity in competitive  
4 labeling experiments using the established chemoproteomic reagent iodoacetamide alkyne (IA-  
5 alkyne),<sup>26, 32</sup> and observed substantial blockade of cysteine labeling at low millimolar concentrations  
6 (Fig. 1d). Together, these results highlight the distinct reactivity of fumarate relative to DMF and  
7 MMF, and suggest this metabolite's covalent reactivity may be most relevant in contexts such as  
8 HLRCC where it accumulates to millimolar levels.

9  
10 *Global chemoproteomic profiling of fumarate-sensitive and FH-regulated cysteine residues*

11  
12 Next we set out to characterize novel targets of fumarate, employing a two-pronged chemoproteomic  
13 approach. First, we evaluated cysteine reactivity changes resulting from direct addition of exogenous  
14 fumarate to proteomes of an untransformed kidney cell line (HEK-293). These studies are designed  
15 to unambiguously define proteomic cysteine residues capable of directly reacting with fumarate,  
16 which we term "fumarate-sensitive" cysteines. Second, we applied chemoproteomics to map  
17 differential cysteine reactivity in FH-deficient (*FH*<sup>-/-</sup>) and FH-rescue (*FH*<sup>+/+</sup>) HLRCC cell lines, which  
18 we term "*FH*-regulated" cysteines. This latter comparison is mechanism-agnostic, identifying *FH*-  
19 regulated cysteine reactivity changes caused by direct S-succination, as well as alternative stimuli  
20 (such as oxidation or altered expression levels), and has potential to highlight biology specific to  
21 HLRCC cells.

22  
23 To identify fumarate-sensitive and *FH*-regulated cysteines we applied IA-alkyne and an LC-MS/MS  
24 platform derived from isoTOP-ABPP (Fig. 2a-c).<sup>32</sup> Briefly, paired samples consisting of either  
25 fumarate-treated and untreated proteomes, or *FH*<sup>-/-</sup> and *FH*<sup>+/+</sup> rescue HLRCC cells, were treated  
26 with IA-alkyne and conjugated to isotopically distinguishable azide biotin tags using click chemistry.

1 Paired samples were pooled, enriched over streptavidin, subjected to on-bead tryptic digest, and IA-  
2 alkyne labeled peptides were released by dithionite cleavage of an azobenzene linker. LC-MS/MS  
3 was used to identify Cys-containing peptides, and the relative intensity ratio (ratio, R) of light/heavy  
4 isotopic pairs in the MS1 spectra was used as quantitative readout of Cys-labeling stoichiometry  
5 (Fig. 2a). In competitive fumarate labeling experiments, a L/H R value of ~1 indicates that a cysteine  
6 was unaffected by fumarate, whereas a L/H R value of 2 indicates ~50% modification (based on the  
7 formula “modification stoichiometry (%) =  $[1-(1/R)]*100\%$ ”; Fig. 2b). Analogously, in comparative  
8 analyses of HLRCC cells, a positive L/H R value indicates a cysteine’s reactivity (or abundance) is  
9 reduced by *FH* mutation (Fig. 2c).

10  
11 Focusing first on fumarate-sensitive cysteines, we applied IA-alkyne to profile reactivity changes  
12 caused by treatment of proteomes with 1 mM fumarate for 15 hours (Fig. 2b, Table S1). This  
13 concentration was chosen to provide covalent labeling in the physiological range of S-succination  
14 but not saturate individual sites, which we hypothesized might limit the dynamic range of reactivity  
15 observed. We performed four independent replicate experiments, and applied additional  
16 reproducibility metrics to specify a subset of high confidence fumarate-sensitive cysteines (identified  
17 in  $\geq 2$  datasets, R standard deviation  $\leq 25\%$ ). Using these criteria, we identified 854 cysteines out  
18 of >2300 quantified residues in human embryonic kidney proteomes which we characterized as  
19 fumarate-sensitive (Table S1). Of these cysteine residues, 569 were classified as highly sensitive (R  
20  $\geq 2$ ) and 285 as moderately sensitive (R = >1, <2), numbers which drop to 317 and 153, respectively,  
21 when requiring detection in  $\geq 3$  datasets. Identified among these hits were 25 known targets including  
22 *GAPDH*, which was found to be only moderately sensitive in our analysis, as well as *KEAP1* and  
23 *ACO2*, which did not meet the criteria for high confidence targets due to large standard deviations  
24 (Table S3). Comparing fumarate-sensitive cysteine residues to those identified in a recent  
25 chemoproteomic study of DMF,<sup>30</sup> we find only a small fraction of residues with  $R \geq 2$  (5.5%) overlap,  
26 once again highlighting the distinct reactivity of these molecules. An analysis of the evolutionary

1 conservation of i) fumarate-sensitive cysteines, ii) fumarate-insensitive cysteines, and iii)  
2 hyperreactive cysteines<sup>26</sup> revealed the former to be the least well-conserved (Fig. 2d). This is  
3 consistent with the hypothesis that fumarate may act as a covalent metabolite only upon  
4 hyperaccumulation, which would limit its reactivity from exerting strong evolutionary pressure. Along  
5 similar lines, the majority of fumarate-sensitive sites were identified on proteins found outside the  
6 mitochondria, where its concentration is highest (Fig. 2e). While in part this likely reflects the inherent  
7 challenge of analysis of the mitochondrial proteome,<sup>33</sup> these data suggest mitochondrial enzymes  
8 may have evolved at an early stage to restrict reactivity with endogenous TCA cycle intermediates.

9  
10 In order to complement our fumarate-sensitivity data, we next evaluated *FH*-regulated changes in  
11 cysteine reactivity (Fig. 2c). For these studies we applied IA-alkyne to comparatively profile an  
12 immortalized cell line derived from an HLRCC patient metastasis (UOK262 *FH*<sup>-/-</sup>) and a rescue cell  
13 line, in which the *FH* gene has been re-introduced through lentiviral transduction (UOK262WT, *FH*<sup>+/+</sup>  
14 rescue).<sup>34</sup> Rescue cell lines exhibit reduced S-succination upon immunoblot analysis relative to *FH*-  
15 <sup>-/-</sup> cells, consistent with their reduced fumarate levels and a measurable decrease in cysteine  
16 occupancy (Fig. S1a). Performing three independent replicate measurements of cysteine reactivity  
17 in this system led to the quantification of 1170 cysteine residues. Of *FH*-regulated cysteines whose  
18 reactivity changed  $\geq 2$ -fold, 219 were upregulated and 112 were downregulated (Table S2). These  
19 numbers are reduced to 130 and 68 when requiring detection in multiple replicates, reflective of the  
20 overall increased noise observed in the endogenous system (Fig. 2c, Table S2).<sup>35</sup> Comparison of  
21 our datasets revealed 151 cysteines classified as both *FH*-regulated and highly fumarate-sensitive  
22 (Fig. 2f). The remaining non-overlapping targets may result from differences in protein expression,  
23 oxidative modifications, and LC-MS/MS sampling between the two datasets. Comparing fumarate-  
24 sensitive and *FH*-regulated cysteines, we found the latter detected a higher percentage of  
25 mitochondrial proteins (Fig. 2e). This is consistent with the mitochondrial production of fumarate, and  
26 suggests reactivity-based profiling of *FH*<sup>-/-</sup> and *FH*<sup>+/+</sup> rescue HLRCC cells may sample distinct

1 reactivity changes caused by oncometabolite compartmentalization. Interestingly, we found that  
2 individual proteins which incorporate multiple *FH*-regulated cysteines often exhibited unidirectional  
3 changes in their reactivity (Fig. S2a, Table S2), a profile that has previously been interpreted as  
4 indicative of global changes in protein abundance.<sup>35</sup> However, we observed similar unidirectional  
5 cysteine reactivity changes in many proteins treated with exogenous fumarate (Fig. S2b, Table S1),  
6 suggesting this may be a genuine feature of covalent labeling by this mild electrophile.

7  
8 To bolster our analysis, we further sought to identify proteins whose fumarate reactivity may be  
9 masked by altered protein abundance in *FH*<sup>-/-</sup> and *FH*<sup>+/+</sup> rescue HLRCC cells (Fig. 3). To examine  
10 this, we performed whole proteome (MudPIT) LC-MS/MS analyses of *FH*<sup>-/-</sup> and *FH*<sup>+/+</sup> rescue  
11 HLRCC cells and used this data to “correct” or normalize our reactivity measurements (Fig. S2c).  
12 Focusing on *FH*-regulated cysteines identified in  $\geq 2$  experiments, we obtained robust protein  
13 abundance data ( $\geq 10$  spectral counts) for 53% of these parent proteins (Table S2). Using this data  
14 to correct our calculated reactivity for protein abundance led to modestly revised reactivity for the  
15 vast majority of residues analyzed, with 367/424 (86%) showing a less than 2-fold change. Of those  
16 that were altered, correction for abundance increased the calculated cysteine reactivity of 7 proteins  
17 by  $\geq 2$ -fold, and decreased the calculated cysteine reactivity of 50 proteins by  $\geq 2$ -fold (Table S2, Fig.  
18 S2d; an exemplary subset is illustrated in Fig. 3a). To validate our LC-MS/MS identifications, we  
19 assessed a subset of targets for fumarate-competitive labeling using the clickable chemotype mimic  
20 FA-alkyne (Fig. 3b). We analyzed proteins harboring fumarate-sensitive cysteines (EEF2,  
21 SMARCC1, MAP2K4), *FH*-regulated cysteines (OAT, HNRNPL), as well as abundance corrected  
22 *FH*-regulated cysteines (CBX5, Fig. S3d). Accordingly, lysates were incubated with fumarate,  
23 labeled with FA-alkyne, and subjected to click chemistry, enrichment, and Western blot (Fig. 3b).  
24 Consistent with LC-MS/MS data, capture of OAT, HNRNPL, EEF2, SMARCC1, and CBX5 exhibited  
25 modest to strong competition by fumarate treatment (Fig. 3c). In contrast, the non-target PKM1  
26 showed no such competition. Interestingly, capture of MAP2K4, which was identified as harboring a

1 fumarate-sensitive cysteine in our in vitro dataset, was also not sensitive to fumarate. This may  
2 indicate imperfect mimicry of fumarate's labeling chemistry by FA-alkyne, the presence of multiple  
3 FA-alkyne reactive cysteine residues, or, alternatively, a false positive in our LC-MS/MS data.  
4 Overall, these studies demonstrate a strategy for comparing cysteine reactivity profiles in clonally  
5 distinct cell lines, and provide an initial glimpse into the sites and stoichiometry of the fumarate-  
6 reactive proteome.

7

### 8 *Molecular and structural determinants of covalent fumarate-cysteine interactions*

9

10 Next we sought to utilize our knowledge of fumarate-sensitive cysteines to better understand the  
11 structural determinants of oncometabolite reactivity. As an initial step, we assessed the highest  
12 stoichiometry fumarate-sensitive cysteines (which represent candidate direct targets of fumarate) for  
13 the presence of linear motifs in their flanking sequences using pLogo (Fig. 4a, Table S4).<sup>36</sup>  
14 Interestingly, fumarate-sensitive cysteines showed an enrichment of acidic residues such as  
15 glutamate (E) and aspartate (D) in their flanking regions. This was unexpected, as nucleophilic  
16 cysteines typically are surrounded by proximal basic residues such as lysine (K) and arginine (R),  
17 which can serve as hydrogen bond donors and help stabilize the developing negative charge of the  
18 thiolate. The atypical nature of this fumarate-sensitivity motif was further supported by pLogo  
19 analysis of fumarate-insensitive and hyperreactive cysteine residues,<sup>26</sup> each of which demonstrated  
20 the expected enrichment of basic, rather than acidic, residues in their flanking motif (Fig. 4b, Fig.  
21 S3a). Fumarate's cysteine reactivity motif was also distinct from that of DMF and HNE (Fig. S3a),<sup>30</sup>  
22 <sup>37</sup> with only MMF showing similar enrichment of flanking acidic residues (Fig. S3a). Considering the  
23 hypothesis that fumarate-sensitive cysteines may possess a unique local sequence environment,  
24 we next asked how fumarate-sensitivity correlated with overall cysteine reactivity. For this analysis  
25 we overlaid upon our fumarate-sensitive cysteines a previously constructed map of proteome-wide  
26 cysteine reactivity, constructed from concentration-dependent analysis of IA-alkyne labeling.<sup>26</sup> In

1 contrast to stimuli such as DMF<sup>30</sup> or GSNO,<sup>32</sup> which target cysteine residues across the reactivity  
2 spectrum, fumarate-sensitive cysteines are strikingly anti-correlated with reactivity (Fig. 4c, Fig. S3b-  
3 c). *FH*-regulated cysteines identified in HLRCC cells exhibit a similar anti-correlation, suggesting this  
4 is not an artifact of the competitive labeling experiment (Fig. 4d). Furthermore, in *GSTO1*, a model  
5 gene which harbors a known nucleophilic cysteine residue, fumarate was found to preferentially  
6 impact a distal cysteine while leaving the active site residue unmodified (Fig. 4e). Similar  
7 observations were made for the hyperreactive cysteine of *NIT2* during analysis of *FH*-regulated  
8 cysteines (Fig. S3b). These analyses define a unique local environment for covalent oncometabolite  
9 labeling.

10  
11 In order to better understand the mechanistic basis for these observations, we explored two  
12 hypotheses. First, we assessed the pKa-dependent reversibility of cysteine S-succination. Our  
13 rationale was that, if low pKa hyperreactive cysteines act as better leaving groups in retro-Michael  
14 reactions, then irreversible reaction with IA-alkyne may obscure their reversible reaction with  
15 fumarate, leading to the observed anti-correlation. To test this hypothesis, we synthesized S-  
16 succinated thiols derived from mercaptans of disparate acidities (Fig. 4f). Next, we assessed the  
17 reversibility of these model substrates using a recently developed fluorescence assay to monitor  
18 fumarate release (Fig. S3e-f).<sup>38</sup> This experiment indicated that while S-succinated thiols did indeed  
19 exhibit pKa-dependent reversibility, the extent of fumarate release was minor, with only 2-4%  
20 reversal observed over 24 hours (Fig. 4f, Fig. S3g). This is consistent with previous studies<sup>39</sup> as well  
21 as the structure of S-succinated cysteine, which resembles ring-opened maleimides engineered for  
22 stable covalent labeling of protein cysteine residues.<sup>40</sup> These studies suggest that while reversible  
23 S-succination is possible, it makes a negligible or minor contribution to fumarate's unique covalent  
24 labeling profile.

25

1 Next, we considered two ways in which electrostatics may alter fumarate reactivity. First, the anionic  
2 nature of fumarate may favor its association with protein surfaces, which are enriched in charged  
3 residues, compared to more hydrophobic hyperreactive cysteine-containing active sites. Indeed,  
4 previous studies have observed unique sites of protein labeling for negatively charged electrophiles  
5 relative to their neutral analogues.<sup>41-43</sup> Second, we hypothesized that protonated hydrogen fumarate  
6 may function as the active electrophile in S-succination reactions. Protonation of fumarate would  
7 increase fumarate's reactivity by lowering its LUMO energy (Fig. S3h), and furthermore limit repulsive  
8 electrostatic interactions with negatively charged thiolates and active-site proximal carboxylates.  
9 Speaking to the feasibility of such a mechanism, the viability of hydrogen fumarate as a reactive  
10 species in aqueous buffer has precedence in previous studies of MMF reactivity.<sup>31</sup> To explore the  
11 potential relevance of these phenomena, we tested the influence of pH on fumarate reactivity. The  
12 neutrally charged electrophile IA-alkyne exhibits increased protein labeling at higher pH, presumably  
13 due to higher thiolate concentrations (Fig. 4g). In contrast, fumarate and FA-alkyne cause increased  
14 protein labeling at lower pH, conditions which favor decreased thiolate and increased hydrogen  
15 fumarate concentrations (Fig. 4g, Fig. S3i). Addition of high salt to S-succination reactions, which  
16 would be expected to decrease fumarate's pKa and reduce ionic interactions, led to overall reduced  
17 labeling of proteins by fumarate (Fig. S3j). In addition to revealing a paradoxical influence of pH on  
18 fumarate reactivity, these studies highlight hydrogen fumarate as a novel molecular entity potentially  
19 responsible for covalent protein modification in HLRCC.

20  
21 *Fumarate-sensitive and FH-regulated cysteines lie in several kidney cancer pathways*

22  
23 To identify novel biology affected by covalent oncometabolism in HLRCC, we next performed  
24 pathway analysis of *FH*-regulated and fumarate-sensitive cysteines. In order to focus our analysis  
25 on succination events likely to have functional effects on protein activity we employed the informatics  
26 tool Mutation Assessor, which predicts functional mutations on the basis of sequence conservation.<sup>44</sup>



1 C to E mutations of fumarate-sensitive cysteine residues were used to mimic the negative charge  
2 gained upon covalent S-succination. Analysis of highly fumarate-sensitive cysteines ( $R \geq 2$ , 50%  
3 stoichiometry) identified by competitive chemoproteomics in all four replicates highlighted 58 proteins  
4 whose modification was expected to have a high or moderate impact on protein function (Fig. 5a,  
5 Table S4). Applying a similar workflow to *FH*-regulated cysteines whose reactivity was  
6 downregulated in HLRCC cells ( $R \geq 2$ , 50% stoichiometry) led to the identification of an additional 69  
7 proteins. Gene ontology analysis found that these candidate S-succinated proteins clustered in  
8 pathways related to mitochondria, metabolism, RNA processing, and transcriptional regulation, many  
9 of which play known roles in kidney cancer pathogenesis (Fig. 5b, Fig. S4a). This suggests several  
10 novel cellular pathways which may be deleteriously impacted by fumarate's covalent reactivity in  
11 HLRCC. To prioritize targets for mechanistic follow-up we used two criteria. First, we focused on  
12 genes for whom multiple patients harboring loss-of-function genetic lesions (mutations or deletions)  
13 had been identified in kidney cancer sequencing experiments (Fig. 5c),<sup>45</sup> positing these targets may  
14 be relevant to renal cell tumorigenesis. Second, we prioritized genes for which structural data  
15 indicated the candidate fumarate-sensitive cysteine mapped to a predicted cofactor or protein-  
16 protein interaction site (Fig. S4b-i), which we hypothesized would facilitate mechanistic analyses.  
17 Employing these criteria, *SMARCC1* emerged as 1) the fumarate-sensitive gene most commonly  
18 lost in renal cell carcinoma patients (Fig. 5c), and 2) harboring a site of fumarate-sensitivity near a  
19 protein-protein interaction interface (Fig. S4b, Fig. 5d-e), This led us to further focus on *SMARCC1*  
20 as a case study to understand the functional consequences of fumarate reactivity.

21

## 22 *Functional analysis of a fumarate-reactive cysteine in SWI/SNF complex*

23

24 *SMARCC1* is a core member of the SWI-SNF chromatin remodeling complex, a known tumor  
25 suppressor in many cancers.<sup>46-47</sup> *SMARCC1* is commonly deleted in clear cell renal cell carcinoma  
26 (ccRCC) due to its position on the short arm of chromosome 3, which lies adjacent to the *VHL* tumor

1 suppressor. Of note, *SMARCC1* does not exhibit coordinate mutation and deletion in *VHL*-deficient  
2 ccRCC, suggesting an intact genomic copy of *SMARCC1* is required for cell growth.<sup>48</sup> Among the  
3 nine cysteine residues on *SMARCC1*, Cys520 (C520) was exclusively identified as fumarate-  
4 sensitive by competitive chemoproteomic experiments. Cys520 lies in *SMARCC1*'s SWIRM domain,  
5 the most common site of *SMARCC1* somatic mutation in cancer. Studies of *SMARCC1*'s mouse  
6 ortholog (*Srg3*) have found the SWIRM domain regulates the stability of SNF5, a tumor suppressive  
7 subunit of SWI/SNF, via direct protein-protein interactions.<sup>49</sup> A recent crystal structure revealed C520  
8 lies within a solvent-exposed helix residing directly at the *SMARCC1*-SNF5 interface, suggesting its  
9 modification may obstruct this protein-protein interaction (Fig. 5e).<sup>50</sup> To test this hypothesis, we  
10 performed co-immunoprecipitation experiments in HEK-293 cells transfected with plasmids encoding  
11 FLAG-tagged SNF5 and either wild-type *SMARCC1*, or a C520E mutant. Mutation of C520 was  
12 found to completely abrogate the ability of SNF5 to capture *SMARCC1* (Fig. 5f, S5a). Similarly, while  
13 ectopic expression of wild type *SMARCC1* stabilized SNF5, the C520E mutation had less of an effect  
14 (Fig. S5b).<sup>51</sup> Additionally, we found that treatment of cells co-overexpressing *SMARCC1*/SNF5 with  
15 cell-permeable ethyl fumarate also reduced SNF5 stability (Fig. S5c).

16  
17 Analysis of HLRCC cells revealed greater labeling of *SMARCC1* C520 by IA-alkyne in *FH*<sup>+/+</sup> rescue  
18 as compared to *FH*<sup>-/-</sup> cells, consistent with covalent modification of this residue by endogenous  
19 fumarate (Fig. 5g). We also identified evidence for modification of the homologous cysteine in  
20 *SMARCC2*, whose SWIRM domain is nearly identical to *SMARCC1*'s (Fig. S5d-e). However, direct  
21 detection of the S-succinated C520 proved more challenging. MudPIT with PTM analysis of *FH*<sup>-/-</sup>  
22 cell lines validated S-succination of several novel proteins identified in our two datasets (GCLM,  
23 PCBP1, TCP1, Table S5), but not *SMARCC1*. S-succination blots of *SMARCC1* immunoprecipitated  
24 from *FH*<sup>-/-</sup> and *FH*<sup>+/+</sup> rescue HLRCC cells were characterized by high background, with slightly  
25 increased signal in *FH*-deficient cells (Fig. 5h). To further explore this phenomenon, we next  
26 examined HLRCC cells for evidence of a disrupted *SMARCC1*-SNF5 interaction. Co-

1 immunoprecipitation of SWI/SNF complex indicated a modest decrease in SMARCC1's interaction  
2 with SNF5 in *FH*<sup>-/-</sup> relative to *FH*<sup>+/+</sup> rescue cells (Fig. 5i). In line with decreased interaction, SNF5  
3 protein, but not transcript levels, are also lower in these cells (Fig. 5i, Fig. S5f-g). While the interaction  
4 between SMARCC1 and SNF5 is weakened, it is not fully disrupted, as glycerol gradient fractionation  
5 indicated that the core SWI/SNF complex remains intact (Fig. S5h). Finally, we observe that the  
6 EZH2 inhibitor EPZ6438 (tazemetostat) manifests a *FH*-dependent toxicity in HLRCC spheroids (Fig.  
7 5 j-k). Of note, decreased SNF5 levels have previously been shown to sensitize tumors to EZH2  
8 inhibition,<sup>52</sup> and the observed effect is consistent with a measurable, but minor, effect of fumarate on  
9 SNF5 function. These studies demonstrate a novel cysteine-dependent protein-protein interaction in  
10 the SWI-SNF complex that may be modulated by oncometabolite accumulation.

### 11 12 *Comparative chemoproteomics reveals ligandable cysteines upregulated in HLRCC*

13  
14 Covalent modifications driven by metabolite reactivity are largely expected to exert deleterious  
15 effects on protein function.<sup>53</sup> However, as a final experiment we wondered whether chemoproteomic  
16 analyses may also be capable of identifying pathways positively influenced by *FH* mutation. To  
17 explore this idea we re-analyzed our chemoproteomic data from *FH*<sup>-/-</sup> and *FH*<sup>+/+</sup> rescue HLRCC  
18 cell lines, particularly focusing on *FH*-regulated cysteines with R values <1 (blue region, Fig. 2c).  
19 Cysteines with these values are almost exclusively found in our comparative analysis of HLRCC  
20 cells, and are expected to originate from proteins whose abundance or activity is increased by *FH*-  
21 deficiency. We applied gene set enrichment analysis (GSEA)<sup>54</sup> to these datasets, and found that *FH*-  
22 deficient cells enriched reactive cysteines belonging to proteins activated by the transcription factors  
23 HIF-1 $\alpha$  and NRF2 (Fig. 6a). This was notable, as each of these pathways have previously been  
24 shown to be overactive in HLRCC.<sup>7, 17, 19</sup> This suggests chemoproteomic analyses may provide a  
25 useful complement to traditional methods such as gene expression profiling for the discovery of novel  
26 cancer pathways. However, an additional advantage of these approaches is that they also have the

1 potential to identify leads for covalent ligand development, as powerfully demonstrated in a recent  
2 analysis of NRF2 mutant cancers.<sup>35</sup> To facilitate such efforts, we cross referenced cysteines  
3 activated by *FH* mutation with a recently disclosed covalent fragment library whose proteome-wide  
4 targets were characterized.<sup>28</sup> This analysis identified ligandable cysteines in many proteins lying  
5 within pathways upregulated upon *FH* loss, including glycolysis, hypoxia, and reactive-oxygen stress  
6 (Fig. 6b). These studies highlight a strategy for mining chemoproteomic data to identify novel targets  
7 and lead fragments for pathway disruption in HLRCC.

8

## 9 **Discussion**

10

11 The discovery of hereditary cancers driven by TCA cycle mutations provided some of the first  
12 evidence that metabolites themselves could fuel tumorigenic signaling.<sup>1-3</sup> Recent data indicates that  
13 “oncometabolic” signaling is not unique to these contexts, but may instead represent a broader  
14 aspect of malignancy.<sup>9, 18</sup> While this provides another powerful example of how studying genetic  
15 disorders can illuminate general cancer mechanisms,<sup>55</sup> understanding precisely how  
16 oncometabolites drive malignant transformation and developing diagnostics to track this process  
17 remains a critical goal. Here we have applied chemoproteomics to define a novel complement of  
18 protein cysteines sensitive to the oncometabolite fumarate and *FH* mutation in the genetic cancer  
19 syndrome HLRCC. Competitive labeling using IA-alkyne facilitates the discovery of fumarate-  
20 sensitive cysteines while circumventing the necessity for antibody-generation or direct detection of  
21 poorly ionizable, negatively charged S-succinated peptides. A distinct feature of our strategy was the  
22 parallel identification of both “fumarate-sensitive” targets via direct competitive labeling, as well as  
23 endogenous “*FH*-regulated” targets via comparative profiling of *FH*<sup>-/-</sup> or *FH*<sup>+/+</sup> rescue HLRCC cell  
24 lines. To our knowledge, this represents the first application of reactivity-based protein profiling to  
25 study an endogenous covalent metabolite,<sup>37, 56</sup> as well as the mutational context that causes its  
26 production.<sup>35</sup> In the future, we anticipate the analyses presented here should provide a useful model

1 for the study of mutational and non-mutational stimuli which cause production of other endogenous  
2 electrophiles, such as lipid electrophiles,<sup>37</sup> itaconate,<sup>57-58</sup> and acyl-CoAs.<sup>59-60</sup>  
3  
4 Fumarate's mild reactivity is distinct from that of endogenous species such as hydrogen peroxide  
5 and hydroxynonenal whose cysteine reactivity has previously been profiled.<sup>37, 56</sup> It is important to  
6 note that while substantial evidence points to an important mechanistic contribution of fumarate's  
7 covalent reactivity to HLRCC pathogenesis, our chemoproteomic data has other important  
8 applications. For example, enzymes containing cysteines whose abundance or reactivity is  
9 increased upon *FH* loss may represent activities whose upregulation is necessary for HLRCC  
10 survival (Fig. 6). Alternatively, it is plausible that a subset of functional fumarate-sensitive cysteines  
11 do not facilitate tumorigenesis, but rather create collateral vulnerabilities that may be exploited for  
12 therapy.<sup>61</sup> This is analogous to the manner in which BRCA1 mutation sensitizes breast cancer to  
13 PARP inhibition,<sup>62</sup> and is a strategy that has already demonstrated utility in the targeting of  
14 oncometabolite-dependent cancers.<sup>63-65</sup> Pathways enriched in functional fumarate-sensitive  
15 cysteines in our gene ontology analyses represent attractive candidates for exploration of this  
16 paradigm (Fig. 5a, Table S4). Finally, non-functional, but high stoichiometry targets of fumarate may  
17 provide stage-specific biomarkers of *FH* status in HLRCC,<sup>20</sup> potentially detectable by site-specific  
18 antibody generation or targeted LC-MS/MS assays. In addition to their relevance to HLRCC, we  
19 anticipate these data will provide a rich resource for understanding fumarate's covalent reactivity in  
20 other settings where this metabolite's accumulation has been observed, including diabetes,<sup>15, 66</sup> non-  
21 hereditary kidney cancer,<sup>67-68</sup> neuroblastoma,<sup>69</sup> colorectal cancer,<sup>70-71</sup> and tumors of the adrenal  
22 gland.<sup>68</sup>  
23  
24 An unanticipated finding of our studies was the observation that fumarate-sensitive cysteines are  
25 enriched in flanking carboxylates and demonstrate an anti-correlation with cysteine reactivity. Of  
26 note, this relationship was not observed with other cysteine-reactive electrophiles. Furthermore, in

1 contrast to iodoacetamide, fumarate (as well as its mono-carboxylate analogue FA-alkyne) showed  
2 increased protein reactivity at acidic pH. These observations recall a recent study of MMF, which  
3 upon incubation with GSH was found to form an equimolar mixture of regioisomeric adducts at the  
4 C2 and C3 positions, consistent with protonated hydrogen MMF acting as the electrophile.<sup>31</sup> By  
5 analogy, the observed pH-dependence suggests that protonation of fumarate, rather than  
6 deprotonation of cysteine, is rate-limiting for fumarate reactivity. This theory, arising from our  
7 chemoproteomic data, suggests that hydrogen fumarate, rather than fumarate, is the signature  
8 covalent oncometabolite of HLRCC, and has several implications. First, since the concentration of  
9 hydrogen fumarate is extremely low in physiological buffer, it suggests that fumarate is likely to act  
10 as a covalent metabolite only under conditions which favor its hyperaccumulation as well as acidic  
11 pH. In this regard HLRCC tumors provide a near ideal environment for S-succination, as in addition  
12 to high fumarate caused by disruption of FH, they exhibit potent production of lactic acid due to  
13 increased glycolytic metabolism.<sup>7, 34</sup> An additional, technical implication is that the repertoire of  
14 reactivity-based protein profiling methods,<sup>26, 28</sup> as well as covalent cysteine-targeting ligands, may  
15 be expanded by incorporating electrostatics as a design element. Future studies will be required to  
16 test this hypothesis, as well as better understand the origins of fumarate's distinct reactivity.

17

18 Fumarate-sensitive cysteines were found to reside in functional domains of proteins that mapped to  
19 a number of pathways relevant to kidney cancer, including mitochondrial metabolism, RNA  
20 processing, and gene expression. Mechanistic analyses of SMARCC1 discovered a fumarate-  
21 sensitive cysteine in the protein's highly-conserved SWIRM domain that is critical for protein-protein  
22 interactions with the tumor suppressor SNF5. Furthermore, we found that HLRCC cells exhibit FH-  
23 dependent changes in SMARCC1 C520 occupancy, as well as evidence of modest SWI/SNF  
24 dysfunction, including reduced SMARCC1-SNF5 interaction, diminished SNF5 levels, and  
25 susceptibility to EZH2 inhibitors. In addition to defining a minor impact of fumarate on SWI/SNF in  
26 HLRCC, our findings also illustrate a larger concept, specifically the potential of covalent metabolites

1 to regulate protein-protein interactions (PPIs) in the nucleus. Building on our analysis of fumarate's  
2 unique labeling profile, is tempting to speculate that the polar labeling environment preferred by  
3 fumarate-sensitive cysteines may predispose the high stoichiometry display of S-succination towards  
4 solvent-exposed surfaces capable of disrupting biomolecular interactions. While relatively few  
5 examples of non-enzymatic reactive metabolite-dependent PPIs exist,<sup>53</sup> the role of cysteine oxidation  
6 in regulating such interactions is well-precedented.<sup>56, 72-73</sup> Our studies suggest further investigation  
7 of fumarate-dependent protein-protein and protein-nucleic acid interactions is warranted.

8  
9 Finally, it is important to point out some limitations of our current approach, as well as future avenues  
10 that may help to address them. One important drawback of our competitive profiling method is that  
11 it does not directly identify S-succinated cysteines, but rather detects cysteines whose reactivity is  
12 altered by fumarate treatment or *FH* mutation. This leads to the caveat that the observed reactivity  
13 changes could be due to direct modification by fumarate, or alternative species such as lipid  
14 electrophiles or reactive oxygen species that are known to be produced as a consequence of *FH*  
15 mutation.<sup>17, 74</sup> Therefore, an important future goal will be the development of improved methods for  
16 direct S-succination analysis, including immunoprecipitation-grade antibodies, and/or techniques  
17 analogous to the biotin-switch protocols used to investigate other cysteine modifications.<sup>75</sup> In  
18 addition, our work illustrates the difficulty of differentiating between changes in reactivity and  
19 expression in *FH* mutant and wild-type cell lines. This issue was also encountered in a recent study  
20 of *NRF2* mutant and wild-type lung cancers<sup>35</sup>, which normalized cysteine reactivity to RNA-Seq gene  
21 expression, in contrast to the whole proteome MudPIT LC-MS/MS data used here. Integration of  
22 these two complementary approaches will likely provide a more complete picture of cysteine  
23 reactivity in future comparative profiling studies. Finally, a critical challenge illustrated by the current  
24 study arises from the sheer magnitude of candidate targets. Using a reproducibility metric of replicate  
25 detection, we identified >100 cysteines predicted to be functionally impacted by fumarate's reactivity  
26 (Table S4), a number which rapidly increases when requiring detection in only a single dataset. While

1 relatively small on a genomic scale, this number of targets far exceeds the bandwidth of most  
2 laboratories for mechanistic follow-up. Therefore, in the future we anticipate chemoproteomic studies  
3 of pleiotropic metabolites such as fumarate will benefit from marriage to other high-throughput  
4 methods, such as pooled CRISPR or siRNA screening approaches<sup>76</sup>, which may allow high-  
5 throughput validation of oncometabolite targets. The data presented here will provide an information-  
6 rich resource for such studies, and ultimately facilitate the definition of fumarate as a signaling  
7 molecule and biomarker in HLRCC and other pathological settings marked by oncometabolite  
8 accumulation.

9

10



1 **Figures**  
2

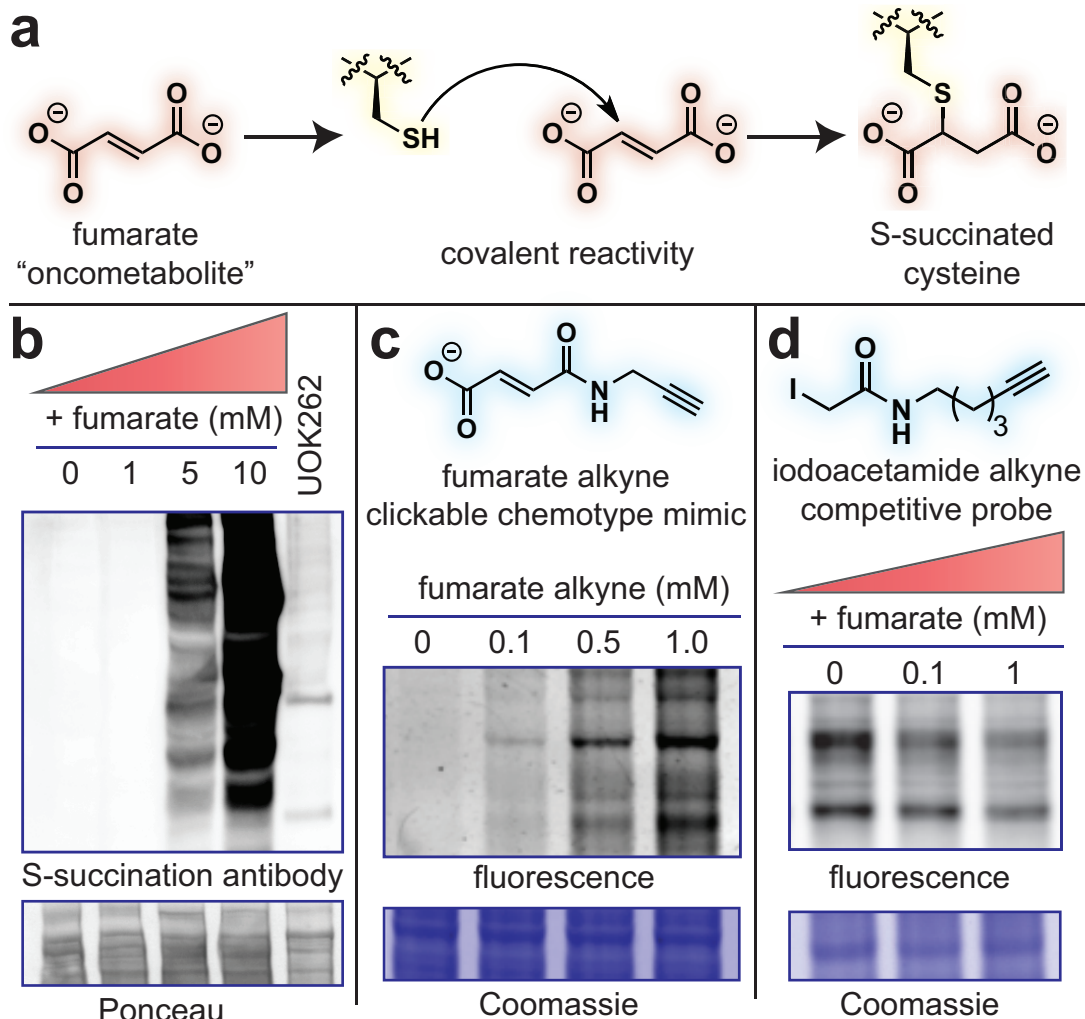

3  
4  
5 **Figure 1.** Fumarate is a covalent oncometabolite. (a) Covalent labeling of cysteine residues by  
6 fumarate yields the PTM S-succination. (b) S-succinated Cys immunoblotting establishes the  
7 physiological range of fumarate required for covalent protein labeling lies in the millimolar range.  
8 HEK-293 proteomes were treated with fumarate (0, 1, 5, 10 mM) for 15 h prior to western blotting.  
9 (c) Fumarate alkyne (FA-alkyne) can be used to visualize reactivity of the fumarate chemotype. HEK-  
10 293 proteomes were treated with FA-alkyne (0, 0.1, 0.5, 1 mM) for 15 h prior to click chemistry. (d)  
11 Iodoacetamide alkyne (IA-alkyne) can be used as a competitive probe of covalent fumarate labeling  
12 (HEK-293; 15 h pre-incubation with fumarate, then 100  $\mu$ M IA-alkyne for 1 h followed by desalting  
13 and click chemistry).

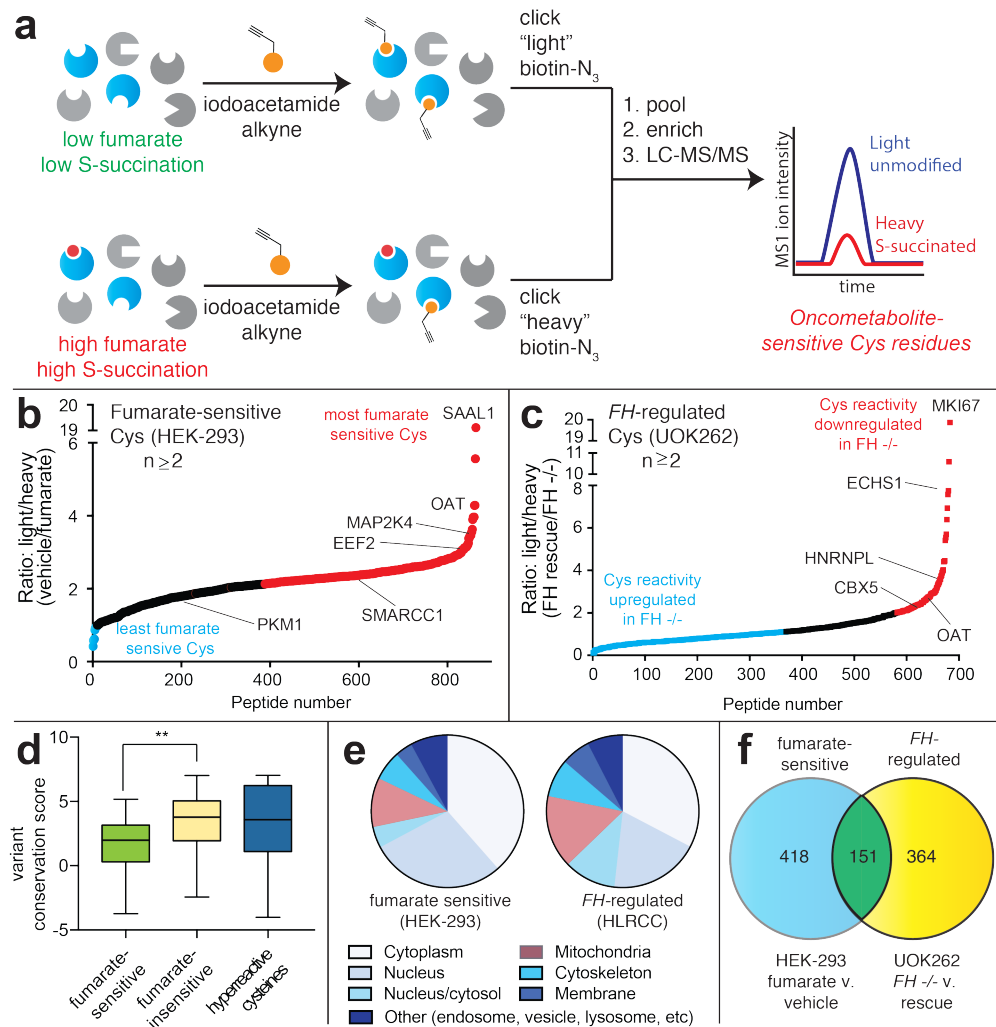

1  
2 **Figure 2.** Global chemoproteomic profiling of fumarate-sensitive and *FH*-regulated cysteine  
3 residues. (a) Applying a competitive cysteine-profiling platform to study the oncometabolite fumarate.  
4 Experiments comparing untreated proteomes to those treated with exogenous fumarate define  
5 “fumarate-sensitive” Cys residues. Experiments comparing proteomes of *FH*<sup>-/-</sup> (UOK262) and *FH*<sup>+/+</sup>  
6 (UOK262WT) define “*FH*-regulated” Cys residues. (b) Fumarate-sensitive Cys residues identified in  
7 HEK-293 cells (n ≥ 2, SD ≤ 25%). (c) *FH*-regulated Cys residues identified in UOK262 cells (n ≥ 2, SD  
8 ≤ 25%). (d) Conservation of fumarate-sensitive, fumarate-insensitive, and hyperreactive cysteine  
9 residues. (e) Subcellular localization of fumarate-sensitive and *FH*-regulated Cys residues. (f)  
10 Overlap of fumarate-sensitive Cys residues (R ≥ 2, n ≥ 2) with *FH*-regulated Cys residues identified  
11 in at least one experiment (R ≥ 1.2, n ≥ 1).

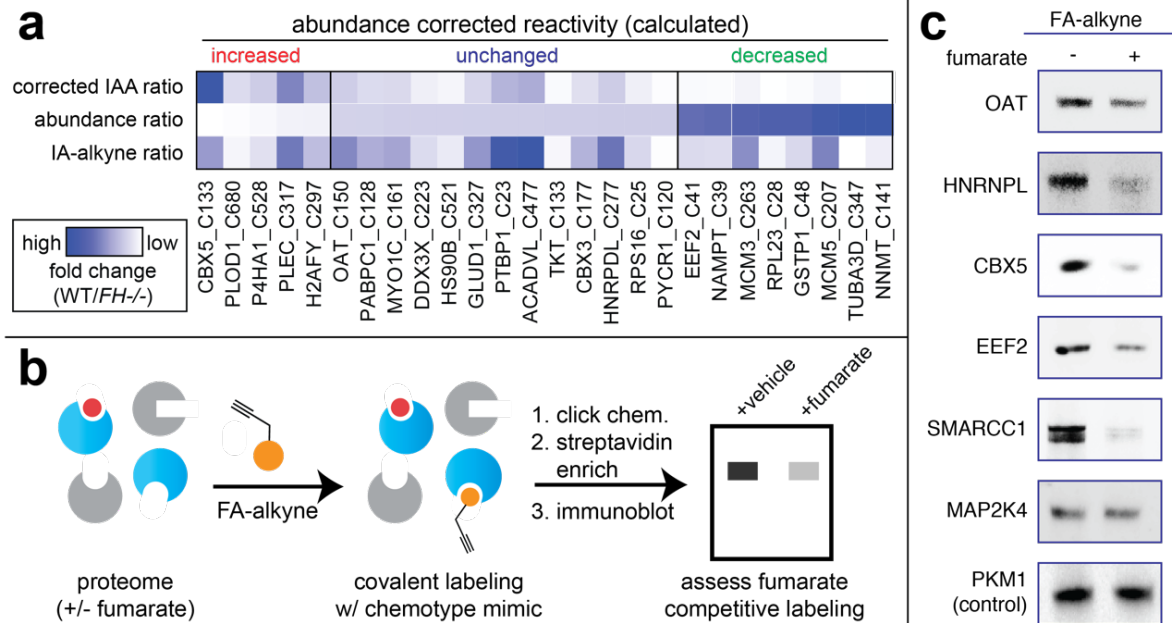

1  
2 **Figure 3.** Analyzing the reactivity and abundance of *FH*-regulated cysteines. (a) Heat map illustrating  
3 strategy for correcting Cys reactivity ratios measured in UOK262 (*FH*-deficient) and UOK262WT  
4 (*FH*-rescue) cells using whole proteome MudPIT LC-MS/MS data. Adjusting for protein abundance  
5 can lead to an increase in calculated reactivity (left protein subset, red), an insignificant change  
6 (middle protein subset, blue), or a decrease in calculated reactivity (right protein subset, green). (b)  
7 Validating fumarate-sensitive and *FH*-regulated Cys residues using the clickable chemotype mimic  
8 FA-alkyne. (c) FA-alkyne capture of proteins that contain fumarate-sensitive or *FH*-regulated Cys  
9 residues is competed by fumarate (3 h pre-incubation with 1 mM fumarate; then 15 h treatment with  
10 100  $\mu$ M FA-alkyne).

11  
12

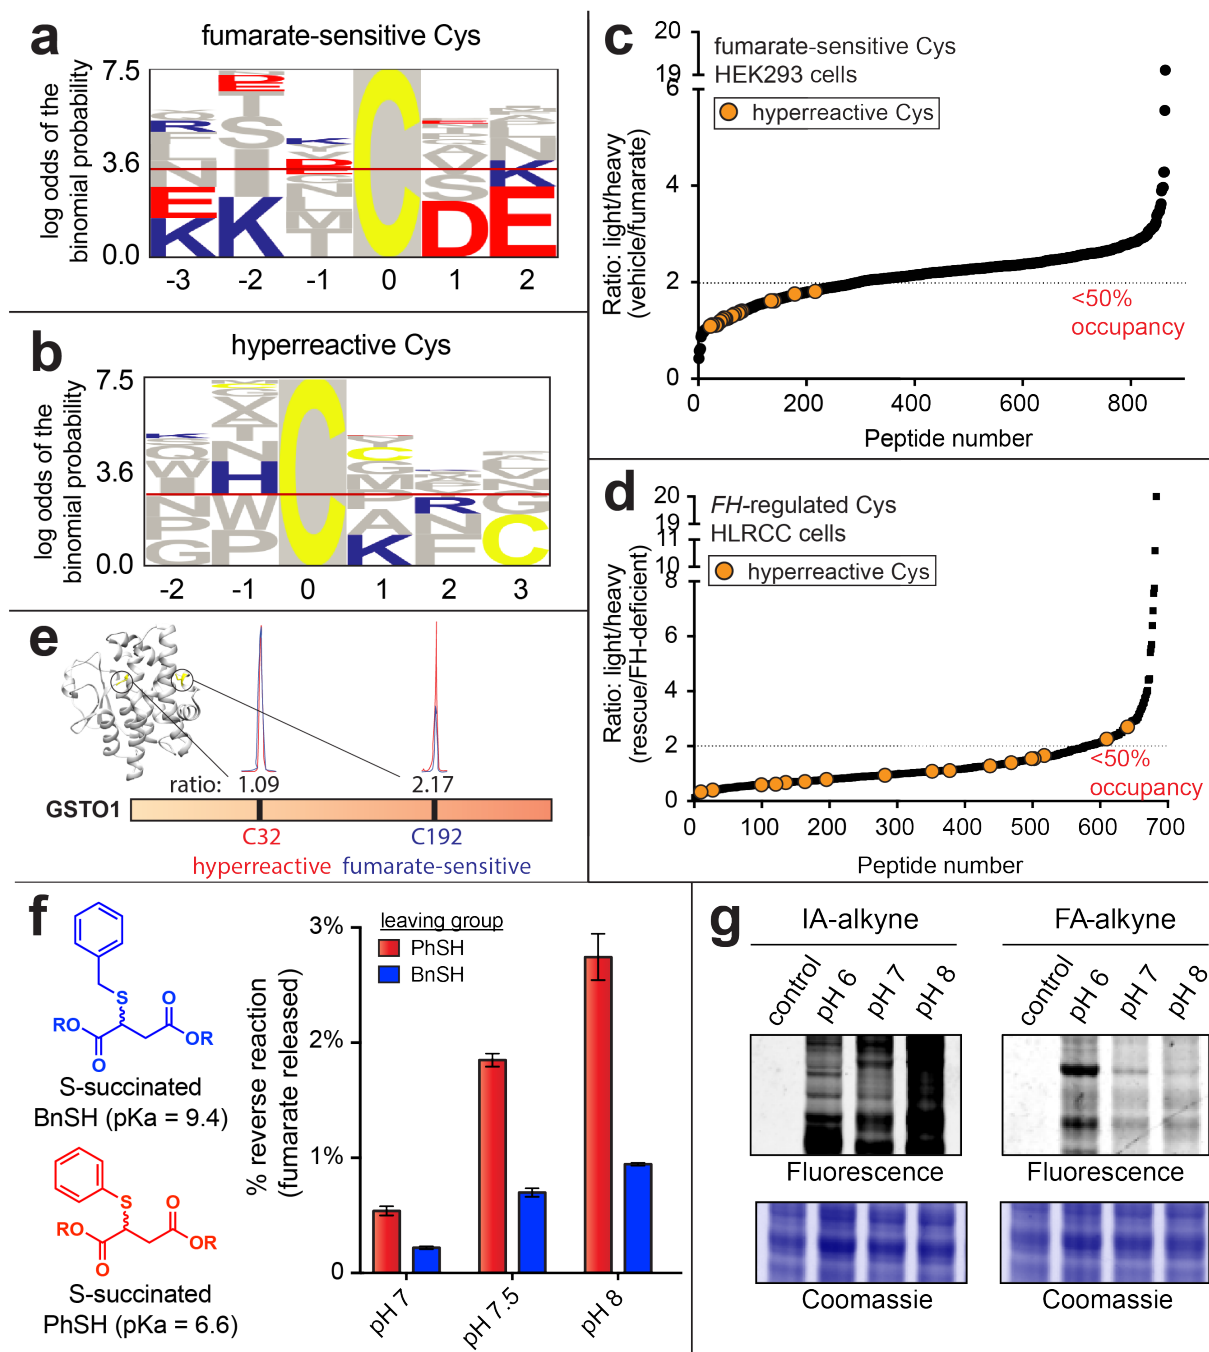

1

2 **Figure 4.** Establishing the molecular determinants of covalent fumarate-protein interactions. (a) Motif

3 analysis of fumarate-sensitive Cys residues reveals an enrichment in flanking carboxylates. (b) Motif

4 analysis of hyperreactive Cys residues identified in Weerapana et al.<sup>26</sup> (c) Fumarate-sensitive Cys

5 residues are anti-correlated with Cys reactivity. (d) FH-regulated Cys residues are anti-correlated

6 with Cys-reactivity. (e) Fumarate preferentially targets a less nucleophilic, non-active site Cys in

1 GSTO1. (f) The reversibility of S-succinated model thiols is dependent on leaving group pKa, but  
2 does not proceed to an appreciable extent. S-succinated thiols (1 mM) were incubated in 100 mM  
3 Tris buffers at 37 °C for 24 h, prior to quantification of DMF release by fluorescence assay. (g) In  
4 contrast to neutral electrophiles such as IA-alkyne, FA-alkyne exhibits a paradoxical increased  
5 reactivity at lower (more acidic) pH. Probe treatments were carried out as follows, prior to the click  
6 chemistry- left: IA-alkyne (1h; 100  $\mu$ M); right: FA-alkyne (15 h, 1 mM).

7

8

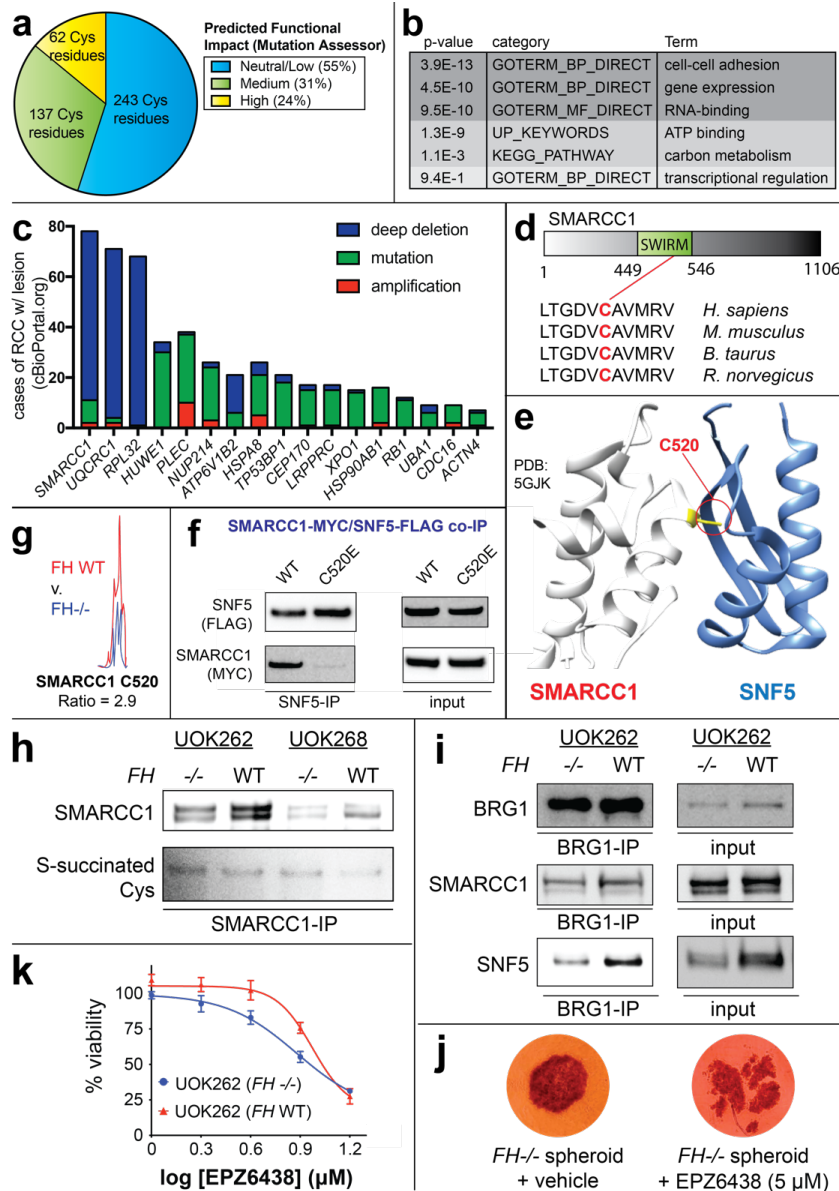

1

2 **Figure 5.** Functional analyses of fumarate-sensitive Cys residues. (a) Percentage of fumarate-  
 3 sensitive and *FH*-regulated Cys residues predicted to be functional using the informatics tool  
 4 Mutation Assessor. (b) Gene ontology analysis of fumarate-sensitive and *FH*-regulated Cys  
 5 residues. (c) Correlation between genes containing fumarate-sensitive Cys residues and genetic  
 6 alterations in kidney cancer (renal cell carcinoma, RCC). (d) SMARCC1 C520 lies in the SWIRM  
 7 domain and is conserved in higher organisms. (e) SMARCC1 C520 lies at the SNF5 subunit  
 8 interface. (f) SMARCC1 C520E mutation limits co-immunoprecipitation with SNF5 in HEK-293 cells

1 co-overexpressing FLAG-tagged SNF5 with Myc-tagged SMARCC1 (WT or C520E mutant). (g)  
2 SMARCC1 C520 undergoes FH-dependent changes in occupancy in HLRCC cell lines despite  
3 identical expression levels [Figure S5]. (h) SMARCC1 S-succination can be detected in FH-deficient  
4 and FH WT HLRCC cell lines post-immunoprecipitation of endogenous SMARCC1. (i) SNF5  
5 demonstrates decreased co-immunoprecipitation and decreased levels in *FH*<sup>-/-</sup> HLRCC cells. Left:  
6 Results from SWI/SNF complex co-immunoprecipitation with BRG1 antibody. Right: Endogenous  
7 levels of SWI/SNF complex members in HLRCC cells. (j) EZH2 inhibitors are toxic to HLRCC  
8 spheroids. UOK262 *FH*<sup>-/-</sup> spheroids were treated with vehicle or EPZ6438 (14 days; 5  $\mu$ M). Figure  
9 shown here is representative of 6 replicates. (k) EZH2 inhibitors exhibit modest selectivity for FH-  
10 deficient HLRCC cells. UOK262 *FH*<sup>-/-</sup> or *FH* WT spheroids were treated with EPZ6438 (21 days; 1,  
11 2, 4, 8, 16  $\mu$ M) and % viability plotted relative to the vehicle treated spheroids.  
12

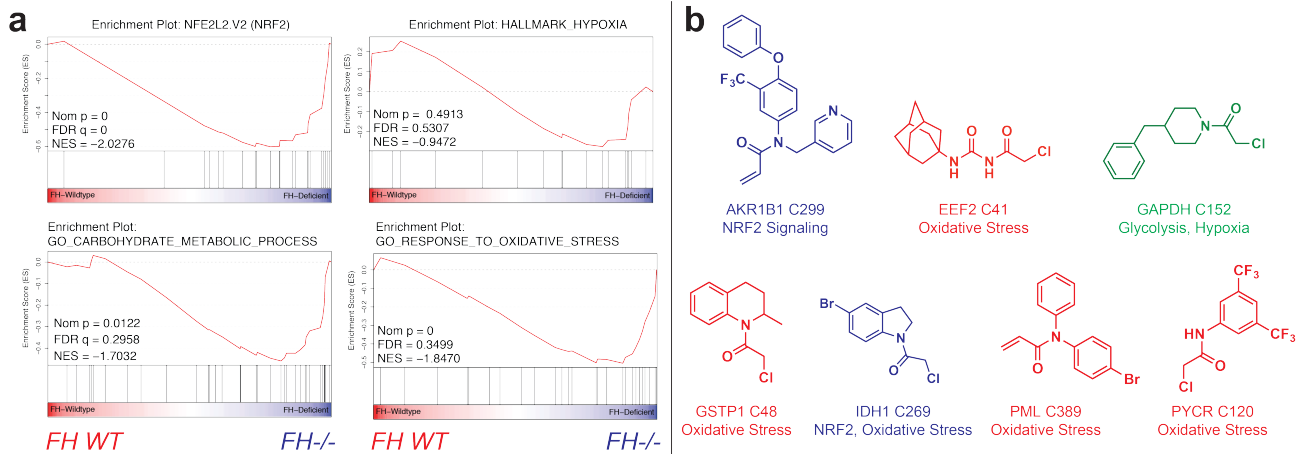

1

2 **Figure 6.** (a) Gene set enrichment analysis (GSEA) of *FH*-regulated Cys residues highlights

3 pathways whose activity is functionally upregulated in HLRCC cells. (b) Fragments identified by

4 Backus et al. targeting Cys residues whose reactivity is enhanced in *FH*-deficient HLRCC cells.

5

6



1 **Supplemental Tables**

2

3 **Table S1.** Fumarate-sensitive cysteines identified by competitive profiling HEK-293 cells treated and  
4 untreated with fumarate.

5

6 **Table S2.** *FH*-regulated cysteines identified by comparative profiling of *FH*<sup>-/-</sup> HLRCC cell line  
7 (UOK262) and a *FH*<sup>+/+</sup> rescue HLRCC cell line (UOK262WT).

8

9 **Table S3.** Compiled list of S-succinated cysteine residues previously characterized in the literature,  
10 and annotation with chemoproteomic data (if available).

11

12 **Table S4.** Sequences used for motif analysis, as well as results for analyses of conservation-based  
13 functional impact (FI), gene ontology (GO), and genomic lesions found in covalent fumarate targets  
14 in kidney cancer.

15

16 **Table S5.** Peptides identified as targets of S-succination in MudPIT LC-MS/MS analyses of HLRCC  
17 cell (UOK262 and UOK268) proteomes.

18

19

20

## 1 Figure Supplements

2

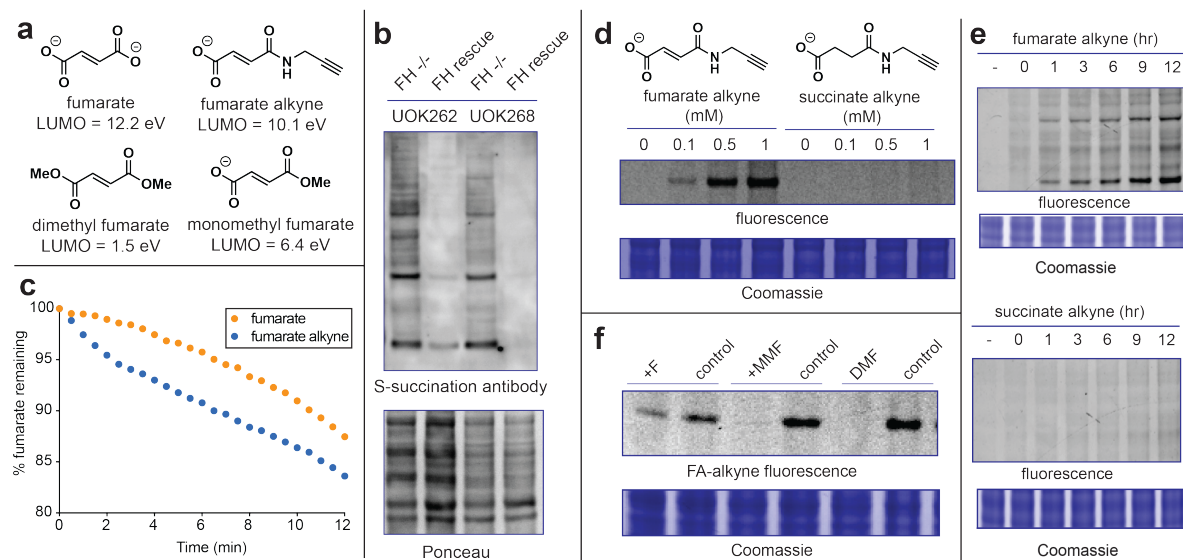

3

4

5 **Figure S1.** (a) Lowest unoccupied molecular orbital (LUMO) energies of fumarate analogues. (b)

6 Cysteine S-succination in HLRCC cells is FH-dependent. (c) Relative reactivity of fumarate (1 mM)

7 and fumarate alkyne (FA-alkyne, 1 mM) with a model thiol (2-mercaptoethanol, 10 mM) in PBS as

8 measured by UV analysis of fumarate at 240 nm. (d) FA-alkyne but not succinate alkyne exhibits

9 dose-dependent protein labeling (15 h treatment; 100, 500, 1000  $\mu$ M). (e) FA-alkyne (1 mM; top

10 panel) but not succinate alkyne (1 mM; bottom panel) exhibits time-dependent protein labeling (0, 1,

11 3, 6, 9, 12 h treatment). (f) Competitive FA-alkyne labeling reveals the reactivity of fumarate (F) is

12 attenuated relative to the previously studied drug dimethyl fumarate (DMF), as well as its metabolite

13 monomethyl fumarate (MMF), (3 h pre-incubation with 1 mM competitor; then 15 h treatment with

14 100  $\mu$ M FA-alkyne).

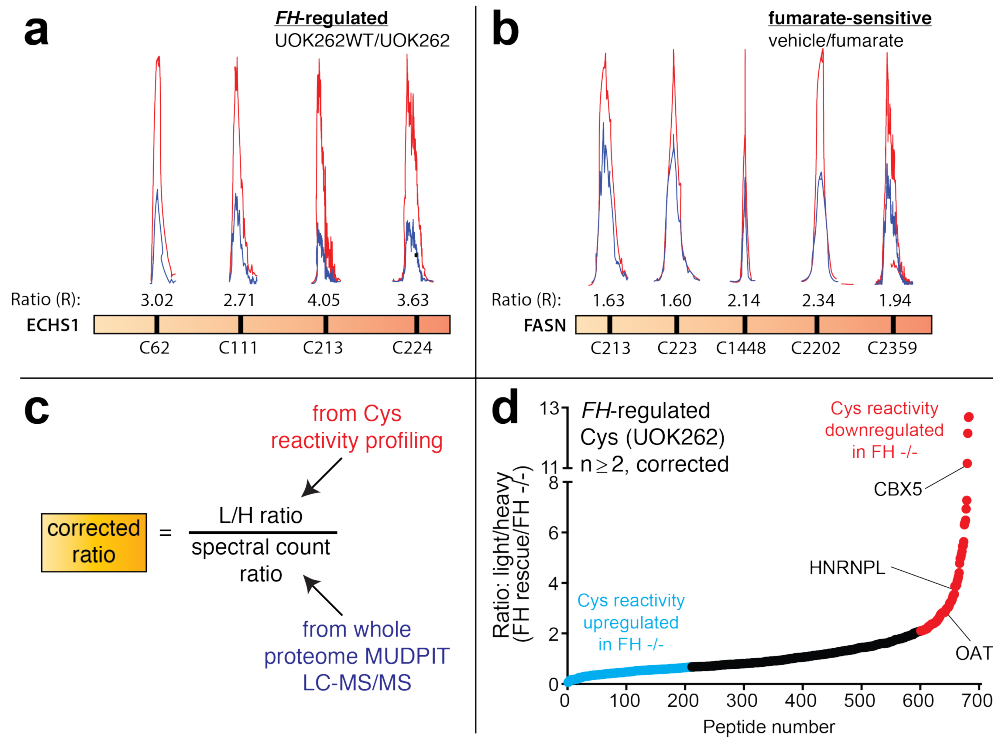

1  
2  
3  
4  
5  
6  
7  
8

**Figure S2.** Examples of proteins with multiple Cys residues exhibiting unidirectional reactivity changes in (a) *FH*-regulated, and (b) fumarate-sensitive datasets. (c) Calculation for corrected Cys reactivity in *FH*-regulated datasets using whole proteome MudPIT data. (d) Plot of *FH*-regulated cysteine residues correcting for abundance changes observed by MudPIT.

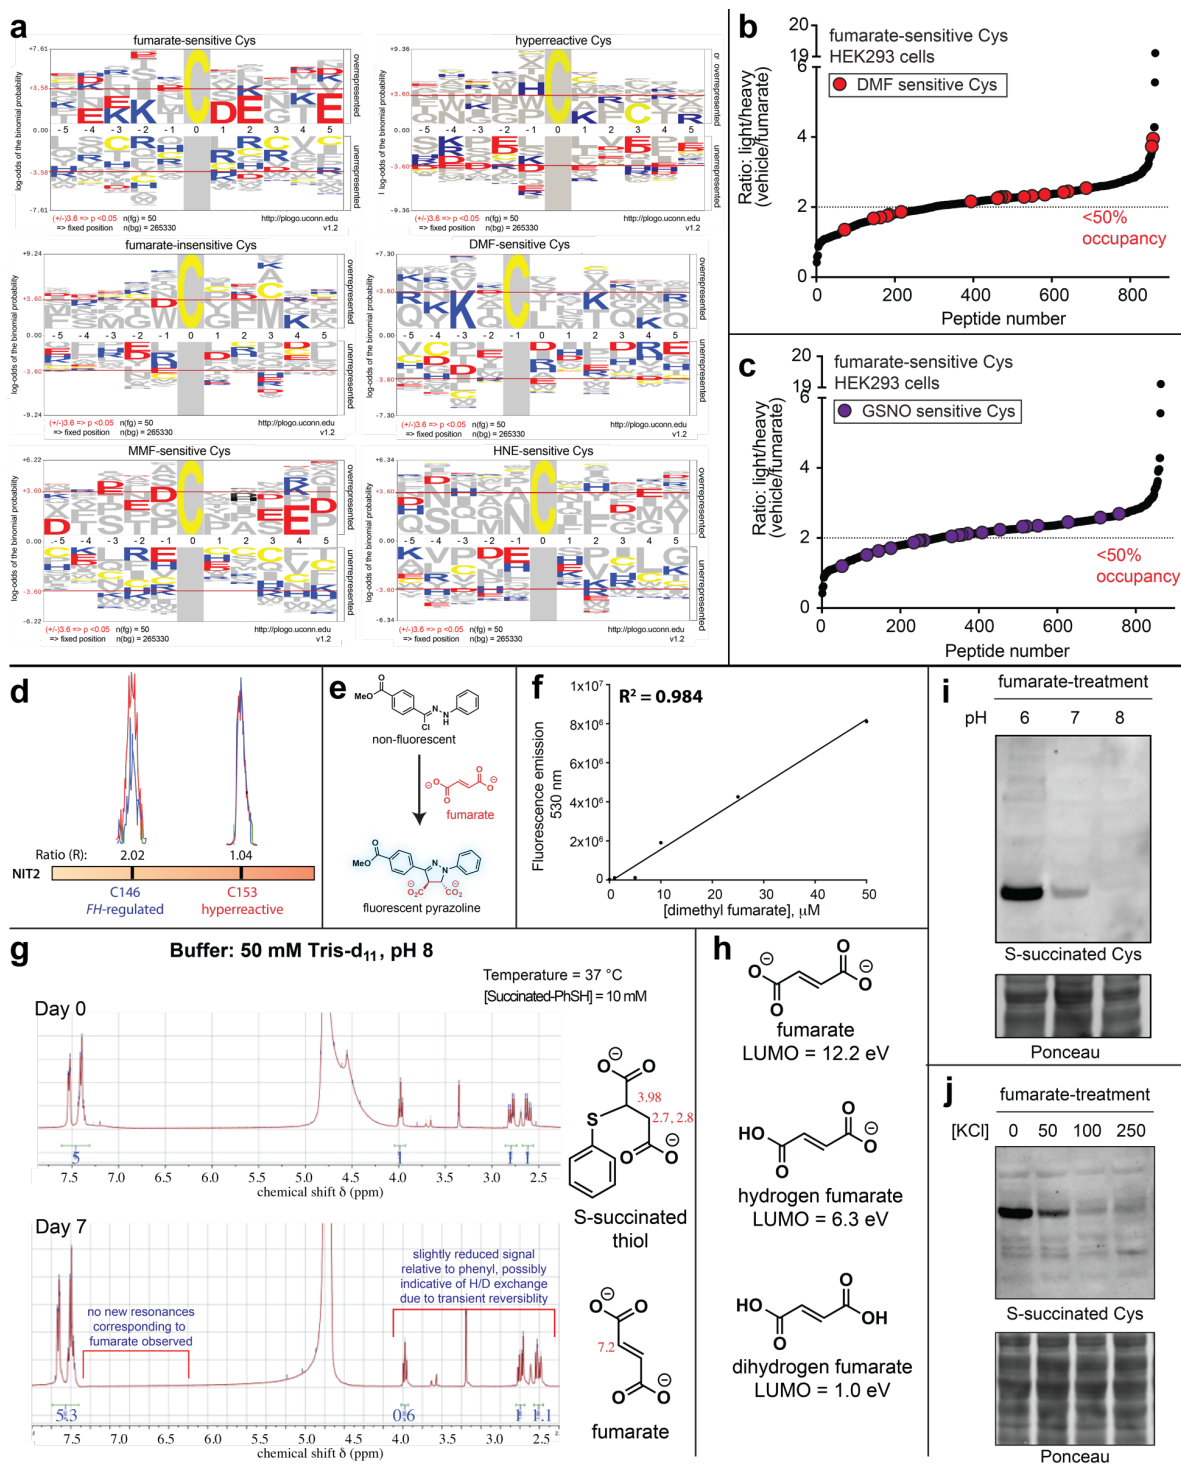

1

2 **Figure S3.** (a) Motif analysis for (left to right) fumarate-sensitive cysteines, hyperreactive cysteines  
 3 (Weerapana et al.), fumarate-insensitive cysteines, DMF-sensitive cysteines, MMF-sensitive  
 4 cysteines, and 4-hydroxynonenal (HNE)-sensitive cysteines. (b) and (c) DMF and GSNO target

1 cysteines across the fumarate-sensitivity spectrum. (d) Fumarate preferentially targets a less  
2 nucleophilic, non-active site Cys in NIT2. (e) Fluorogenic reaction for fumarate detection. (f)  
3 Calibration curve for fluorescent detection of DMF release from model S-succinated substrates. (g)  
4 NMR analysis of reversible S-succination.  $^1\text{H}$  NMR spectra of model S-succinated thiols (10 mM final  
5 concentration, 50  $\mu\text{L}$  of 100 mM stock in  $\text{DMSO-}d_6$ ) incubated in 50 mM TRIS- $d_{11}$  buffer (pH 8,  
6 adjusted using 1 M deuterium chloride, 450  $\mu\text{L}$ ) in  $\text{D}_2\text{O}$  at 37 °C for 7 days. (h) LUMO energies of  
7 fumarate and protonated analogues. (i) Proteomic S-succination proceeds more efficiently at lower  
8 pH. (j) Proteomic S-succination by exogenous fumarate is antagonized by increasing ionic strength.  
9 For (i) and (j) HEK-293 proteomes were treated with fumarate (5 mM) for 15 h prior to western  
10 blotting.

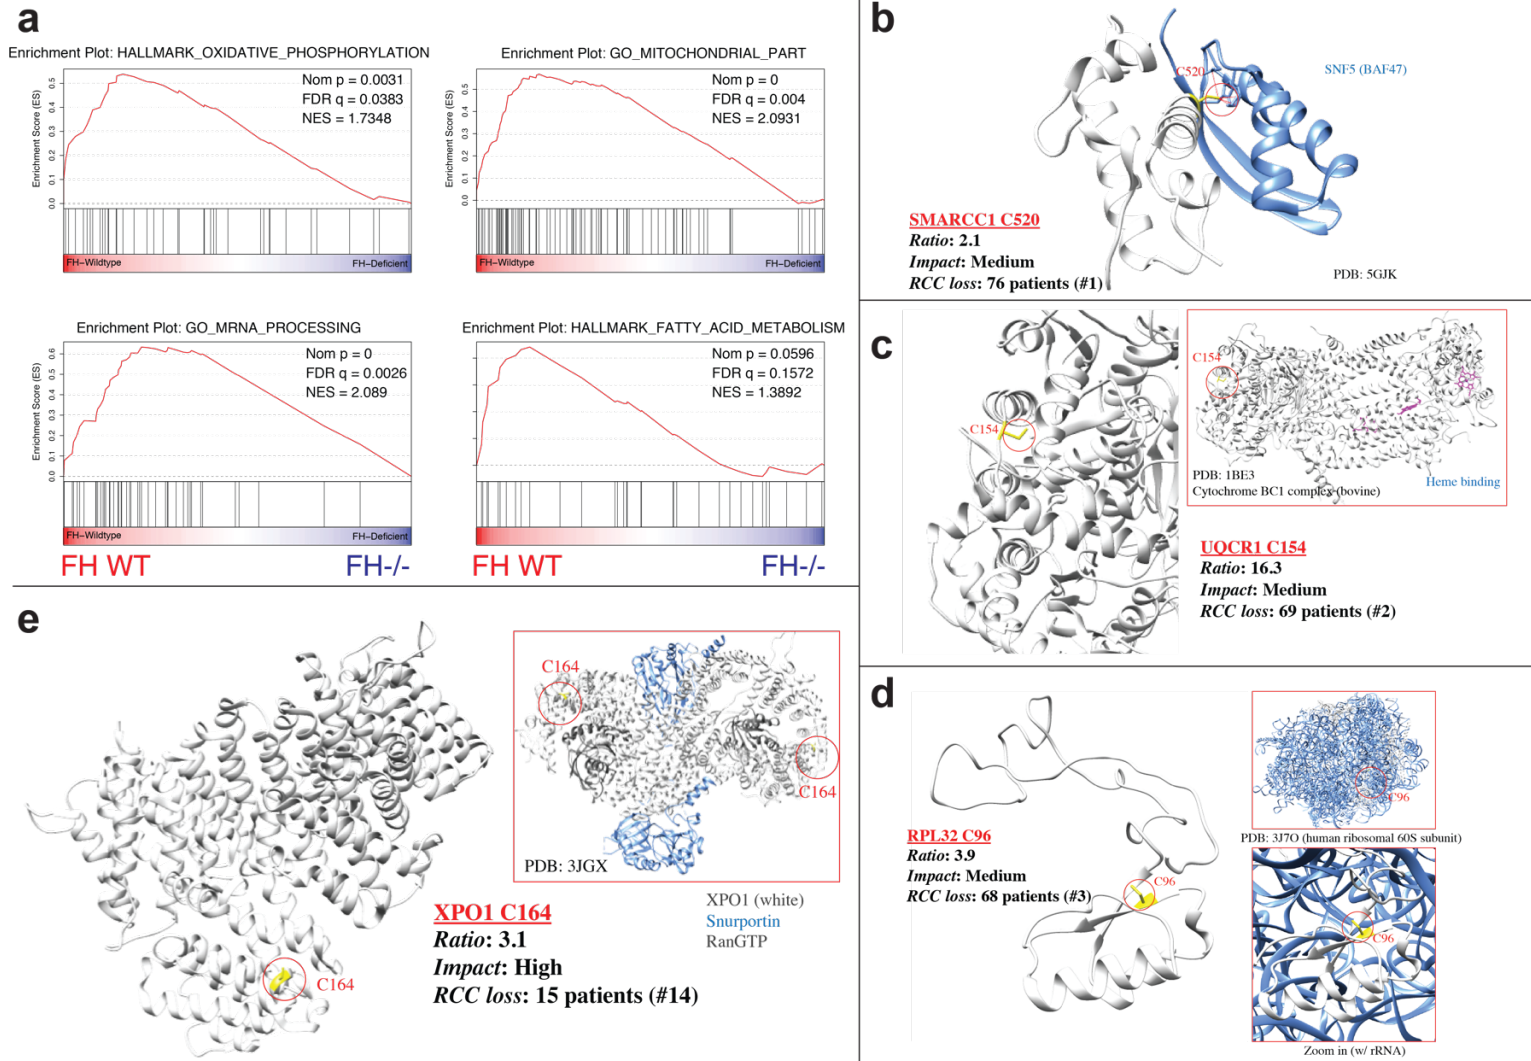

1

2 **Figure S4.** See next page for caption.



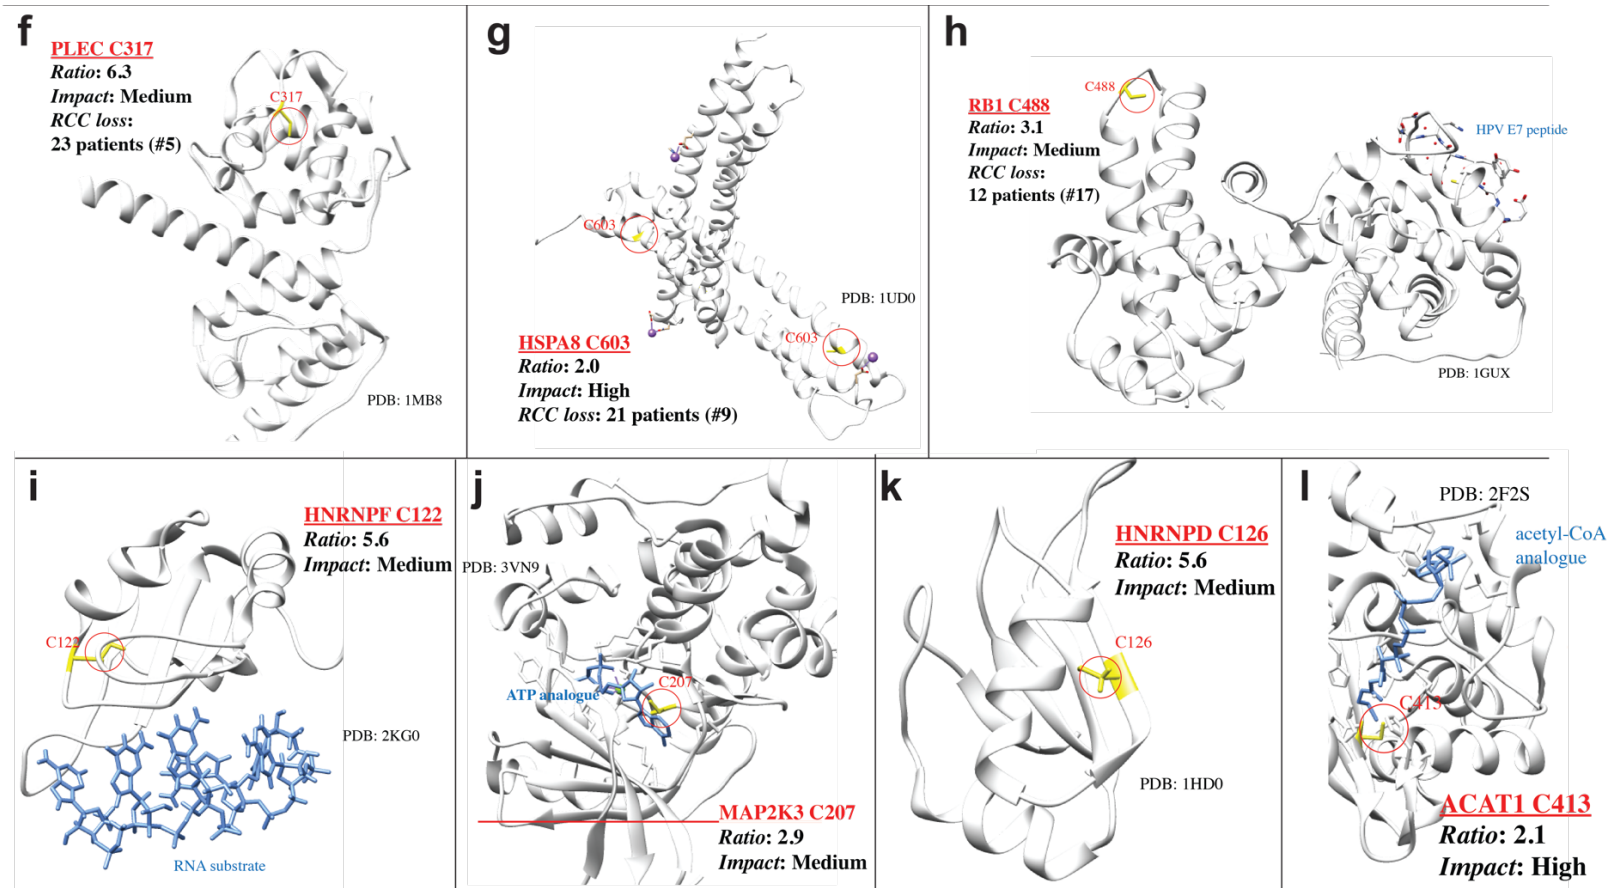

1

2

3 **Figure S4.** (a) Gene set enrichment analysis (GSEA) of *FH*-regulated Cys residues highlights pathways whose activity is functionally

4 repressed in HLRCC cells. (b) Structural analysis of functional Cys residues in SMARCC1, (c) UQCR1, (d) RPL32, (e) XPO1,

5 (f) PLEC, (g) HSPA8, (h) RB1, (i) HNRNPF, (j) MAP2K3, (k) HNRNPD, (l) ACAT1. In cases where mutations are known in kidney

6 cancer, genes are annotated by cBioPortal "rank" (see Figure 5C, Table S4).

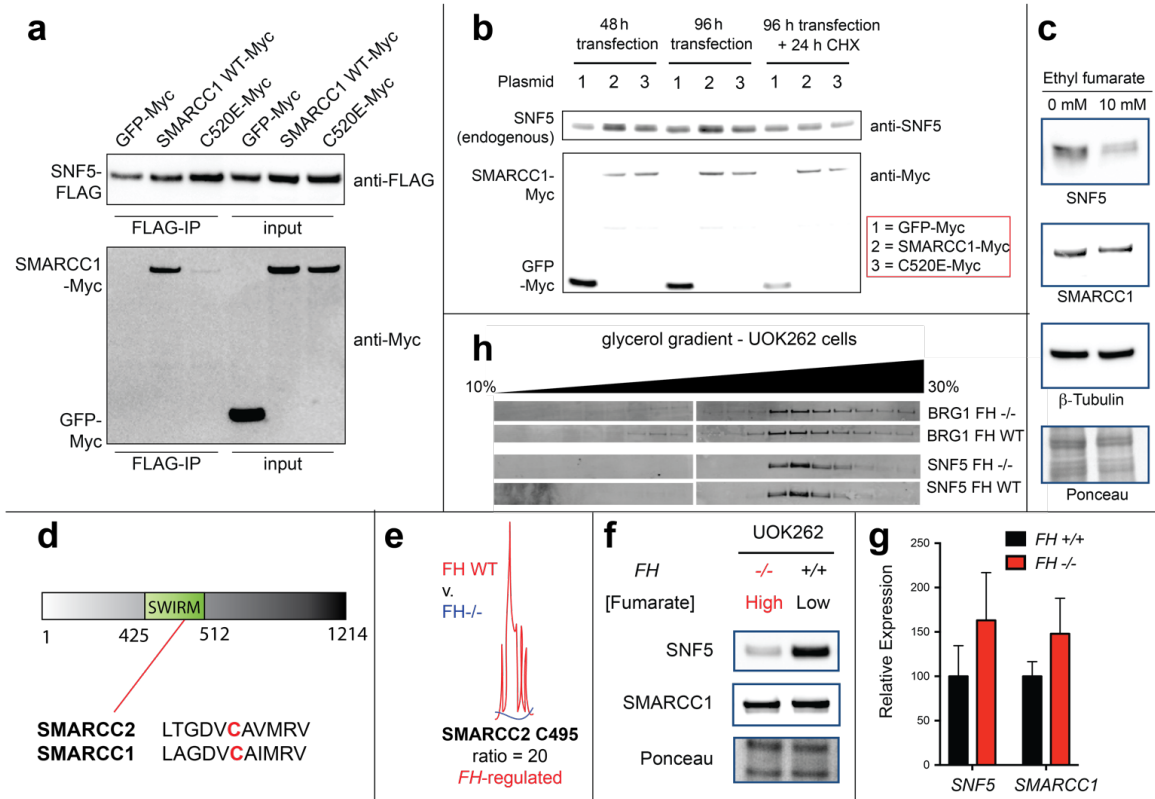

1  
2 **Figure S5.** (a) Full immunoblotting data for SMARCC1-SNF5 co-immunoprecipitation in HEK-293  
3 cells co-overexpressing FLAG-tagged SNF5 with Myc-tagged SMARCC1 (WT or C520E mutant) or  
4 control (Myc-tagged GFP). (see Figure 5g). (b) Overexpression of SMARCC1-WT but not SMARCC1-  
5 C520E causes stabilization of endogenous SNF5 in HEK-293 cells compared to the GFP control.  
6 Cycloheximide (CHX, 200  $\mu$ g/mL, 24 h) treatment leads to increased degradation of SNF5 in  
7 SMARCC1-overexpressing cells compared to the control. (c) Cell permeable ethyl fumarate (10 mM,  
8 12 h treatment) causes degradation of endogenous SNF5 but not SMARCC1. (d) The SWIRM  
9 domains of SMARCC1 and SMARCC2 are highly homologous and include a conserved cysteine. (e)  
10 C495 of the SMARCC2 SWIRM (homologous to SMARCC1 C520) undergoes *FH*-regulated  
11 occupancy changes in HLRCC cells. (f) SNF5, but not SMARCC1, levels are lower in *FH*-deficient  
12 HLRCC cells. (g) Expression of *SNF5* and *SMARCC1* is not significantly altered by *FH* loss as  
13 assessed by qRT-PCR. (h) Glycerol gradient fractionation indicates *FH* status does not greatly alter  
14 SWI-SNF composition in UOK262 cell lines.



## 1 **Materials and Methods**

2

### 3 **General materials and methods**

4 HEK-293 cells were obtained from the NCI tumor cell repository. UOK262 (*FH*<sup>-/-</sup>), UOK262WT (*FH*<sup>+/+</sup> rescue), UOK268 (*FH*<sup>-/-</sup>) and UOK268WT (*FH*<sup>+/+</sup> rescue) cells were obtained from Linehan lab  
5  
6<sup>34</sup>. Plasmids encoding FLAG-tagged SNF5, Myc-tagged SMARCC1 and Myc-tagged GFP were  
7 obtained as a gift from Trevor Archer (Epigenetics & Stem Cell Biology Laboratory, NIEHS). C520E  
8 mutation was introduced to Myc-SMARCC1 entry clone using custom oligos along with the Quick  
9 Change Site-Directed Mutagenesis Kit (Agilent #200515) and transformed into DH10B cells. The  
10 insert was fully sequenced to confirm the mutation. Transfection-quality plasmid DNA was generated  
11 using the GenElute HP Maxiprep Kit. Qubit Protein Assay kit was purchased from Life Technologies  
12 (Q33212). Streptavidin agarose resin was purchased from ThermoFisher Scientific (20353). S-  
13 succinated-Cys antibody was kindly provided by Prof. Norma Frizzell (University of South Carolina).  
14 SMARCC1 (11956), SNF5 (8745), BRG1 (3508), PKM1 (7067), Myc-Tag (2278), FLAG-Tag (14793)  
15 and HA-Tag (3724) antibodies were purchased from Cell Signaling Technologies. OAT (A305-355A),  
16 HNRNP-L (A303-895A), CBX5 (A300-877A), EEF2 (A301-688A) and MAP2K4 (A302-658A)  
17 antibodies were purchased from Bethyl Laboratories, Inc. IP-grade antibodies for SMARCC1 (sc-  
18 32763) and BRG1 (sc-17796) were obtained from Santa Cruz Biotechnology. Protein A/G plus  
19 agarose resin was purchased from Sigma (20423). Fumaric acid (A10976) and ethyl fumarate  
20 (A12545) were purchased from Alfa Aesar. Maleic acid (M0375), dimethyl fumarate (242926) and  
21 mono-methyl fumarate (651419) were purchased from Sigma. Cycloheximide (14126) and EPZ6438  
22 (16174) were purchased from Cayman chemical. Anti-FLAG pulldown was performed using  
23 immunoprecipitation kit (KBA-319-383) from Rockland Immunochemicals, Inc. SDS-PAGE was  
24 performed using Bis-Tris NuPAGE gels (4-12%, Invitrogen #NP0322), and MES running buffer (Life  
25 technologies #NP0002) in Xcell SureLock MiniCells (Invitrogen) according to the manufacturer's  
26 instructions. SDS-PAGE fluorescence was visualized using an ImageQuant Las4010 Digital Imaging

1 System (GE Healthcare). Total protein content on SDS-PAGE gels was visualized by Blue-silver  
2 Coomassie stain, made according to the published procedure.<sup>77</sup> For western blotting, SDS-PAGE  
3 gels were transferred to nitrocellulose membranes (Novex, Life Technologies # LC2001) by  
4 electroblotting at 30 volts for 1 hour using a XCell II Blot Module (Novex). Membranes were blocked  
5 using StartingBlock (PBS) Blocking Buffer (Thermo Scientific) for 20 minutes, then incubated  
6 overnight at 4°C in a solution containing the primary antibody of interest (1:3000 dilution for S-  
7 succinated-Cys antibody and 1:1000 dilution for all other antibodies) in the above blocking buffer  
8 with 0.05% Tween 20. The membranes were next washed with TBST buffer, and incubated with a  
9 secondary HRP-conjugated antibody (anti-rabbit IgG, HRP-linked [7074], Cell Signaling, 1:1000  
10 dilution) for 1 hour at room temperature. The membranes were again washed with TBST, treated  
11 with chemiluminescence reagents (Western Blot Detection System, Cell Signaling) for 1 minute, and  
12 imaged for chemiluminescent signal using an ImageQuant Las4010 Digital Imaging System (GE  
13 Healthcare).

14

### 15 **Cell culture and isolation of whole-cell lysates**

16 HEK-293 cells were cultured at 37 °C under 5% CO<sub>2</sub> atmosphere in a growth medium of DMEM  
17 supplemented with 10% FBS and 2 mM glutamine. UOK262 and UOK268 cell lines were cultured in  
18 DMEM supplemented with 10% FBS, 2 mM glutamine, 1 mM pyruvate. UOK262WT and UOK268WT  
19 cell lines were cultured in DMEM supplemented with 10% FBS, 2 mM glutamine, 1 mM pyruvate and  
20 0.3 mg/mL of G418. Unfractionated proteomes were harvested from cell lines (80-90% confluency)  
21 by washing adherent cells 3x with ice cold PBS, scraping cells into a Falcon tube, and centrifuging  
22 (1400 rcf x 3 min, 4 °C) to form a cell pellet. After removal of PBS supernatant, cell pellets were either  
23 stored at -80 °C or immediately lysed by sonication. For lysis, cells were first resuspended in 1-2 mL  
24 ice cold PBS (10-20 x 10<sup>6</sup> cells/mL) containing protease inhibitor cocktail (1x, EDTA-free, Cell  
25 Signaling Technology # 5871S) and PMSF (1 mM, Sigma # 78830). These samples were then lysed  
26 by sonication using a 100 W QSonica XL2000 sonicator (3 x 1s pulse, amplitude 1, 60s resting on

1 ice between pulses). Lysates were pelleted by centrifugation (14,000 rcf x 30 min, 4 °C) and  
2 quantified on a Qubit 2.0 Fluorometer using a Qubit Protein Assay Kit. Quantified proteomes were  
3 diluted to 2 mg/mL and stored in 1 mg aliquots at -80 °C for chemoproteomic or enzyme activity  
4 analyses. For the studies involving pH-dependence, cells were lysed in a lysis buffer containing 50  
5 mM potassium phosphate buffer at specified pH, 1 mM PMSF and 1x protease inhibitor cocktail.

6

### 7 **Gel-based detection of FA-alkyne labeled proteomes**

8 20 µg proteome was incubated with specified concentration of FA-alkyne at room temperature for  
9 the specified time. For competition experiments, 1 mg proteome (0.5 mL, 2 mg/mL) was pre-  
10 incubated with the competitor (1 mM) for 3 h, followed by 15 h treatment with FA-alkyne (100 µM).  
11 Proteomes were then desalted using Illustra™ NAP-5 columns(GE Healthcare # 17085301) to  
12 remove unreacted reagents and 20 µg proteomes were used for analysis. Proteins labeled by FA-  
13 alkyne were visualized by SDS-PAGE via Cu(I)-catalyzed [3 + 2] cycloaddition with a fluorescent  
14 azide as previously reported.<sup>78-79</sup> Briefly, TAMRA-azide (100 µM; 5 mM stock solution in DMSO),  
15 TCEP (1 mM; 100 mM stock in H<sub>2</sub>O), tris-(benzyltriazolylmethyl)amine ligand (TBTA; 100 µM ; 1.7  
16 mM stock in DMSO:tert-butanol 1:4), and CuSO<sub>4</sub> (1 mM; 50 mM stocks in H<sub>2</sub>O) were sequentially  
17 added to the labeled proteome. Reactions were vortexed, incubated at room temperature for 1 hour,  
18 quenched by addition of 4x SDS-loading buffer (strongly reducing) and analyzed by SDS-PAGE.  
19 Gels were fixed and destained in a solution of 50% MeOH/40% H<sub>2</sub>O/10% AcOH overnight to remove  
20 excess probe fluorescence, rehydrated with water, and visualized using an ImageQuant Las4010  
21 (GE Healthcare) with green LED excitation ( $\lambda_{\text{max}}$  520–550 nm) and a 575DF20 filter.

22

### 23 **Chemoproteomic labeling and enrichment of fumarate-sensitive and *FH*-regulated cysteines**

24 For profiling of fumarate-sensitive cysteines, 2 mg of HEK-293 proteomes (1 mL, 2 mg/mL) were  
25 incubated with 1 mM fumaric acid (10 µL, 100 mM stock in DMSO) or vehicle (DMSO, 10 µL)

1 overnight at room temperature, followed by labeling with 100  $\mu$ M IA-alkyne (10  $\mu$ L, 10 mM stock in  
2 DMSO) for 1 h. Proteomes were then desalted using NAP-5 columns to remove unreacted reagents.  
3 For identification of *FH*-regulated cysteines, 2 mg of UOK262 or UOK262WT proteomes (1 mL, 2  
4 mg/mL) were labeled with 100  $\mu$ M IA-alkyne (10  $\mu$ L, 10 mM stock in DMSO) for 1 h at room  
5 temperature. For enrichment of fumarate-sensitive and *FH*-regulated cysteines, probe labeled  
6 proteins were then conjugated to light (low fumarate proteomes: vehicle-treated HEK-293 or  
7 UOK262WT) or heavy (high fumarate proteomes: fumarate-treated HEK-293 or UOK262)  
8 diazobenzene biotin-azide (azo) tag by Cu(I)-catalyzed [3 + 2] cycloaddition as previously reported.<sup>80</sup>  
9 Briefly, azo-tag (100  $\mu$ M), TCEP (1 mM), TBTA (100  $\mu$ M), and CuSO<sub>4</sub> (1 mM) were sequentially  
10 added to the labeled proteome. Reactions were vortexed and incubated at room temperature for 1  
11 h. Proteomes labeled with heavy and light azo-tags were then combined pairwise and centrifuged  
12 (6500 rcf x 10 min, 4 °C) to collect precipitated protein. Supernatant was discarded, and protein  
13 pellets were resuspended in 500  $\mu$ L of methanol (dry-ice chilled) with sonication, and centrifuged  
14 (6500 rcf x 10 min, 4 °C). This step was repeated, and the resulting washed pellet was redissolved  
15 (1.2% w/v SDS in PBS; 1 mL); sonication followed by heating at 80-95 °C for 5 min was used to  
16 ensure complete solubilization. Samples were cooled to room temperature, diluted with PBS (5.9  
17 mL), and incubated with Streptavidin beads (100  $\mu$ L of 50% aqueous slurry per enrichment) overnight  
18 at 4 °C. Samples were allowed to warm to room temperature, pelleted by centrifugation (1400 rcf x  
19 3 min), and supernatant discarded. Beads were then sequentially washed with 0.2% SDS in PBS (5  
20 mL x 1), PBS (5 mL x 3) and H<sub>2</sub>O (5 mL x 3) for a total of 7 washes.

21

## 22 **On bead reductive alkylation, tryptic digest and diazobenzene cleavage of proteomic samples**

23 Following the final wash, protein-bound streptavidin beads were resuspended 6 M urea in PBS (500  
24  $\mu$ L) and reductively alkylated by sequential addition of 10 mM DTT (25  $\mu$ L of 200 mM in H<sub>2</sub>O, 65 °C  
25 for 20 min) and 20 mM iodoacetamide (25  $\mu$ L of 400 mM in H<sub>2</sub>O, 37 °C for 30 min) to each sample.

1 Reactions were then diluted by addition of PBS (950  $\mu$ L), pelleted by centrifugation (1400 rcf x 3  
2 min), and the supernatant discarded. Samples were then subjected to tryptic digest by addition of  
3 200  $\mu$ L of a pre-mixed solution of 2M urea in PBS, 1 mM  $\text{CaCl}_2$  (2  $\mu$ L of 100 mM in  $\text{H}_2\text{O}$ ), and 2  $\mu$ g  
4 of Trypsin Gold (Promega, 4  $\mu$ L of 0.5  $\mu$ g/ $\mu$ L in 1% acetic acid). Samples were shaken overnight at  
5 37  $^\circ\text{C}$  and pelleted by centrifugation (1400 rcf x 3 min). Beads were then washed sequentially with  
6 PBS (500  $\mu$ L x 3) and  $\text{H}_2\text{O}$  (500  $\mu$ L x 3). Labeled peptides were eluted from the beads by sodium  
7 dithionite mediated cleavage of the diazobenzene of the azo-tag. For this, beads were incubated with  
8 freshly prepared 50 mM sodium dithionite in PBS (50  $\mu$ L) for 1 h at room temperature. Beads were  
9 pelleted by centrifugation (1400 rcf x 3 min) and supernatant was transferred to a new Eppendorf  
10 tube. The cleavage process was repeated twice more with 50 mM sodium dithionite (75  $\mu$ L) and  
11 supernatants were combined with the previous. The beads were additionally washed two times with  
12 water (75  $\mu$ L) and supernatants were collected and combined with previous. Formic acid (17.5  $\mu$ L)  
13 was added to the combined supernatants and samples were stored at -20  $^\circ\text{C}$  until ready for LC-  
14 MS/MS analysis.

15

### 16 **LC-MS/MS and data analysis for quantitative cysteine reactivity profiling**

17 Mass spectrometry was performed using a Thermo LTQ Orbitrap Discovery mass spectrometer  
18 coupled to an Agilent 1200 series HPLC. Labeled peptide samples were pressure loaded onto 250  
19 mm fused silica desalting column packed with 4 cm of Aqua C18 reverse phase resin (Phenomenex).  
20 Peptides were eluted onto a 100 mm fused silica biphasic column packed with 10 cm C18 resin and  
21 4 cm Partisphere strong cation exchange resin (SCX, Whatman), using a five step multidimensional  
22 LC-MS protocol (MudPIT). Each of the five steps used a salt push (0%, 50%, 80%, 100%, and 100%),  
23 followed by a gradient of buffer B in Buffer A (Buffer A: 95% water, 5% acetonitrile, 0.1% formic acid;  
24 Buffer B: 20% water, 80% acetonitrile, 0.1% formic acid) as outlined previously.<sup>81-82</sup> The flow rate  
25 through the column was  $\sim$ 0.25  $\mu$ L/min, with a spray voltage of 2.75 kV. One full MS1 scan (400-1800  
26 MW) was followed by 8 data dependent scans of the  $n^{\text{th}}$  most intense ion. Dynamic exclusion was

1 enabled. The tandem MS data, generated from the 5 MudPIT runs, was analyzed by the SEQUEST  
2 algorithm.<sup>83</sup> Static modification of cysteine residues (+57.0215 m/z, iodoacetamide alkylation) was  
3 assumed with no enzyme specificity. The precursor-ion mass tolerance was set at 50 ppm while the  
4 fragment-ion mass tolerance was set to 0 (default setting). Data was searched against a human  
5 reverse-concatenated non-redundant FASTA database containing Uniprot identifiers. MS datasets  
6 were independently searched with light and heavy azo-tag parameter files; for these searches  
7 differential modifications on cysteine of +456.2849 (light) or +462.2987 (heavy) were used. MS2  
8 spectra matches were assembled into protein identifications and filtered using DTASelect2.0,<sup>84</sup> with  
9 the `-trypstat` and `-modstat` options applied. Peptides were restricted to fully tryptic (`-y 2`) with a found  
10 modification (`-m 0`) and a delta-CN score greater than 0.06 (`-d 0.06`). Single peptides per locus were  
11 also allowed (`-p 1`) as were redundant peptide identifications from multiple proteins, but the  
12 database contained only a single consensus splice variant for each protein. RAW files have been  
13 uploaded to the PRIDE database and are directly available for the authors during review upon request.  
14 Quantification of L/H ratios were calculated using the cimage quantification package described  
15 previously.<sup>26</sup>

16

### 17 **Whole proteome protein abundance analysis**

18 100 µg of UOK262 or UOK262WT proteomes (100 µL, 1 mg/mL) were precipitated by the addition  
19 of 5 µL 100% trichloroacetic acid in PBS, vortexed and frozen at -80 °C overnight. Samples were  
20 thawed, and proteins were pelleted by centrifugation (17000 rcf x 10 min). Each protein pellet was  
21 washed by resuspension in acetone (500 µL) using sonication, followed by centrifugation (2200 rcf  
22 x 10 min). Supernatant was discarded, pellet was allowed to dry and then resuspended thoroughly  
23 by sonication in 30 µL 8M urea in PBS. Reductive alkylation was then performed by sequential  
24 addition of 70 µL of 100 mM ammonium bicarbonate and 1.5 µL of 1M DTT (65 °C for 15 min) and  
25 iodoacetamide (2.5 µL of 400 µM in H<sub>2</sub>O, room temperature for 30 min). Reactions were then diluted  
26 by addition of PBS (120 µL) and tryptic digest was performed by addition of 2 µg of Trypsin Gold and

1 and 2.5  $\mu$ L of 100 mM  $\text{CaCl}_2$ , followed by overnight incubation at 37 °C. Trypsin was quenched by  
2 addition of 10  $\mu$ L formic acid (~5% final volume) and undigested protein was pelleted by  
3 centrifugation (17000 rcf x 20 min). Supernatant was collected and stored at -20 °C until ready for  
4 LC-MS/MS analysis which was performed using ~50  $\mu$ L of each sample. LC-MS/MS was performed  
5 as described above with slight modification to MudPIT protocol. Here salt pushes of 0%, 25%, 50%,  
6 80%, and 100% were employed. Tandem MS data analysis was performed as described above.  
7 Spectral counting was used for calculating the UOK262WT:UOK262 protein abundance ratios for  
8 those proteins which had >10 spectral counts in at least one of the two cell lines and these ratios  
9 were used to correct the *FH*-regulated cysteine ratios wherever possible.

10

### 11 **Bioinformatic analysis of fumarate-sensitive and *FH*-regulated cysteines**

12 Annotation of protein subcellular localization as well as cysteine function and conservation was  
13 generated from the Uniprot Protein Knowledgebase (UniProtKB) as described previously.<sup>33, 85</sup>  
14 Analysis of linear sequences flanking fumarate-sensitive and *FH*-regulated cysteines was performed  
15 using the informatics tool pLogo, accessible at: <https://plogo.uconn.edu>. Input sequences are listed  
16 in Table S4, and were derived from the 50 cysteines found to be most fumarate-sensitive and  
17 insensitive in this study, (highest and lowest R values,  $n \geq 2$ ,  $SD \leq 25\%$ ), as well as the 50 cysteines  
18 found to be most hyperreactive,<sup>26</sup> DMF-sensitive,<sup>30</sup> MMF-sensitive,<sup>30</sup> GSNO,<sup>32</sup> and HNE-sensitive<sup>37</sup>  
19 in literature datasets. Protein sequences for motif analysis were derived from their tryptic peptide  
20 sequences using Peptide Extender ([schwartzlab.uconn.edu/pepextend](http://schwartzlab.uconn.edu/pepextend)). Conservation and  
21 functional impact of fumarate-sensitive and *FH*-regulated cysteines identified in chemoproteomic  
22 experiments was analyzed using the informatics tool Mutation Assessor, accessible at:  
23 <http://mutationassessor.org/r3>. Conservation analysis depicted in Fig. 2d represents the output of  
24 the variant conservation (VC) score for the 50 cysteines found to be most fumarate-sensitive in this  
25 study (highest L/H ratio [R] values,  $n \geq 2$ ,  $SD \leq 25\%$ ), the 50 cysteines found to be least fumarate-



1 sensitive in this study (lowest R values), and the 50 cysteines found to be most hyperreactive in a  
2 previous chemoproteomic study performed by Weerapana et al.<sup>26</sup> Potential functional impact of  
3 fumarate modifications (Fig. S5a, Table S4) reflects the effect of C to E mutations on the functional  
4 impact (FI) output of Mutation Assessor. Gene ontology analysis was performed using the  
5 bioinformatics tool DAVID, accessible at: <http://david.ncifcrf.gov/>. Output tables in Table S4 reflect  
6 DAVID analysis of fumarate-sensitive and *FH*-regulated cysteines predicted to have a medium or  
7 high impact on protein function by Mutation Assessor. Candidate functional fumarate targets were  
8 assessed for cases of genomic alteration in renal cell carcinoma (clear cell and non-clear cell) using  
9 cBioPortal (<http://cbioportal.org>). Structural analysis of candidate functional fumarate targets known  
10 to undergo genomic alteration in renal cell carcinoma was performed using Chimera. For gene set  
11 enrichment analysis (GSEA, Fig. 6), R values for fumarate-sensitive and *FH*-regulated peptides were  
12 log<sub>2</sub>-transformed and analyzed for 1000 permutations using the Broad Institute's javaGSEA desktop  
13 application (<http://software.broadinstitute.org/gsea/downloads.jsp>). For proteins in which R values  
14 were measured for more than one cysteine-containing peptide, the peptide with the greatest absolute  
15 R value was used for GSEA analysis. GSEA outputs were re-plotted for graphics using a variant of  
16 ReplotGSEA package, accessible at: [https://github.com/PeeperLab/Rtoolbox/blob/](https://github.com/PeeperLab/Rtoolbox/blob/master/R/ReplotGSEA.R)  
17 [master/R/ReplotGSEA.R](https://github.com/PeeperLab/Rtoolbox/blob/master/R/ReplotGSEA.R).

18

### 19 **Validation of fumarate-sensitive and *FH*-regulated targets using FA-alkyne**

20 5 mg of HEK-293 proteome (2.5 mL, 2 mg/mL) was pre-treated with 1 mM fumaric acid (25  $\mu$ L, 100  
21 mM stock in DMSO) or DMSO for 3 hours prior to incubation with 100  $\mu$ M FA-alkyne (25  $\mu$ L, 10 mM  
22 stock in DMSO) for 15 hours. Proteomes were then desalted using Illustra™ NAP-25 columns (GE  
23 Healthcare # 17085201) to remove unreacted reagents. Labeled proteomes were enriched via Cu(I)-  
24 catalyzed [3 + 2] cycloaddition with biotin-azide as described above for chemoproteomic analysis.  
25 Following the final wash, enriched resin was collected on top of centrifugal filters (VWR, 82031-256).



1 Proteins were eluted from resin via addition of 40  $\mu$ L 1x SDS sample buffer, followed by boiling for  
2 10 min at 95 °C. Following repetition of the elution step, both eluents were combined and 20  $\mu$ L of  
3 the combined eluent was loaded onto a 4-12% SDS-PAGE gel and analyzed by western blotting.

4

#### 5 **Fluorescent quantification of fumarate release from S-succinated thiols**

6 S-succinated thiols (1 mM final concentration, 5  $\mu$ L of 20 mM stock in DMSO) were incubated in  
7 TRIS buffer (100 mM; pH 7, 7.5, 8, and 8.5) at 37 °C for 24 h. After incubation, reactions were  
8 developed by treatment with equal volume of hydrazonyl chloride **4** from Zengeya et al.<sup>38</sup> (150  $\mu$ M  
9 final concentration, 300  $\mu$ M stock in CH<sub>3</sub>CN) for 1 h at room temperature. Fluorescence produced  
10 was then measured on Photon Technology International QuantMaster fluorimeter using 1-cm path  
11 length, 0.13 mL quartz microcuvettes (Helma #101-015-40) at ambient temperature (22  $\pm$  2 °C),  
12 using an excitation wavelength of 390 nm, slit width of 3.5 nm, and monitoring emission from 410  
13 nm to 615 nm. Fluorescence emission values at 530 nm were used to calculate percent DMF  
14 released by interpolating into a standard curve of DMF reacting hydrazonyl chloride **4** under identical  
15 conditions.

16

#### 17 **Ectopic expression and co-immunoprecipitation of SMARCC1 and SNF5**

18 HEK-293 cells were plated in 10 cm dishes (3  $\times 10^6$  cells/dish in 10 ml DMEM media/well), and  
19 allowed to adhere and grow for 24 h. FLAG-tagged SNF5 was co-overexpressed with Myc-tagged  
20 GFP, SMARCC1 or SMARCC1-C520E using lipofectamine 2000 (Invitrogen # 11668019) according  
21 to the manufacturer's instructions. Co-overexpressions were carried out by incubating the cells for  
22 48 h at 37 °C under 5% CO<sub>2</sub> atmosphere, after which the cells were harvested, soluble proteome  
23 isolated and quantified as described above. Anti-FLAG pulldown was performed using  
24 immunoprecipitation kit (KBA-319-383) according to the manufacturer's instruction. 1 mg of the  
25 lysate was incubated with the anti-FLAG resin overnight at 4 °C. Purified protein was ran on SDS-  
26 PAGE and immunoblotted against anti-Myc-tag and anti-FLAG-tag.

1

## 2 **Cellular analysis of SMARCC1 overexpression on SNF5 levels**

3 HEK-293 cells were plated in 6-well dishes ( $6 \times 10^5$  cells/well in 3 ml DMEM media/well), and allowed  
4 to adhere and grow for 24 h. At this point, transient transfection of plasmids encoding for Myc-tagged  
5 GFP, SMARCC1 or SMARCC1(C520E) was performed using lipofectamine 2000 (Invitrogen #  
6 11668019) according to the manufacturer's instructions. Overexpression was carried out by  
7 incubating the cells for 48 h at 37 °C under 5% CO<sub>2</sub> atmosphere. For the cycloheximide treatment  
8 experiment, overexpression was carried out for 96 h. After 96 h, media was changed and cells were  
9 incubated with 200 µg/mL cycloheximide or vehicle for additional 24 h. After the treatment, cells were  
10 harvested, and soluble proteome was isolated and quantified as described above. 10 µg of lysates  
11 were loaded per lane of the gel for the western blot analysis of endogenous SNF5 and expression  
12 levels of Myc-tagged GFP, SMARCC1 or SMARCC1(C520E).

13

## 14 **Co-immunoprecipitation of endogenous SMARCC1 and BRG1 in HLRCC cells**

15 For co-immunoprecipitation of endogenous SMARCC1 and BRG1, whole cell lysates from HLRCC  
16 cells were first prepared by resuspending cell pellets in IP-buffer containing 50 mM Tris pH 8, 400  
17 mM NaCl, 2 mM EDTA, 10% glycerol, 1% NP-40 (Ipegal® CA-630, Sigma # I8896), 1 mM PMSF  
18 and 1X protease inhibitor cocktail. The lysates were pelleted by centrifugation (14,000 rcf x 30 min,  
19 4 °C) and pre-cleared by incubating with protein A/G plus agarose resin (30 µL) for 1 h at 4 °C. Pre-  
20 cleared supernatant was collected by centrifugation (10,000 rcf x 5 min, 4 °C) and diluted to 1 mg/mL  
21 concentration. For each co-immunoprecipitation, 2 mg of whole cell proteome was incubated with  
22 2.5 µg/mL of SMARCC1 (sc-32763) or BRG1 (sc-17796) antibody at 4 °C for 1 h. Protein A/G plus  
23 agarose resin (100 µL) was added to each sample and incubated overnight at 4 °C. Samples were  
24 pelleted by centrifugation, supernatant was discarded, and beads were then washed with IP-buffer  
25 (1 mL x 3). Enriched proteins were eluted from resin via addition of 40 µL 1× SDS sample buffer,

1 followed by boiling for 10 min at 95 °C. Following repetition of the elution step, both eluents were  
2 combined and 20 µL of the combined eluent was loaded onto a 4-12% SDS-PAGE gel and analyzed  
3 by western blotting.

4

#### 5 **qRT-PCR analysis of SWI/SNF expression in HLRCC cells**

6 Total RNA was isolated from  $1 \times 10^6$  cells using the RNeasy Plus mini kit (Qiagen cat. #74136) and  
7 500-1000 ng of purified RNA was used as template for cDNA synthesis (Life Technologies, cat.  
8 #18080-051). mRNA expression of *SMARCC1* and *SNF5* in UOK262 cells was normalized to the  
9 housekeeping gene *ACTB* ( $\beta$ -actin). *SMARCC1* and *SNF5* primers were taken from DelBove et al.<sup>47</sup>,  
10 while *ACTB* primers were taken from PrimerBank.<sup>86</sup> Primers used were as follows- *SMARCC1*:  
11 CACCCAGCCAGGTCAGAT (forward) and TGCAACAGTGGGAATCATGC (reverse); *SNF5*:  
12 CAGAAGACCTACGCCTTCAG (forward) and GTCCGCATCGCCCGTGTT (reverse); and  
13 *ACTB*: CATGTACGTTGCTATCCAGGC (forward) and CTCCTTAATGTCACGCACGAT (reverse).  
14 Quantitative real-time PCR was performed using PerfeCTa SYBR Green FastMix (Quanta  
15 Biosciences, cat. #95072) and a mastercycler ep-gradient realplex<sup>2</sup> (Eppendorf). Baseline was set  
16 manually at two cycles prior to the earliest visible amplification of fluorescence. Threshold was set  
17 manually at the lower half of linear phase amplification. Results are expressed as fold change above  
18 UOK262WT cells after normalization to *ACTB* expression using the  $\Delta\Delta C_t$  method, as previously  
19 described.<sup>87</sup>

20

#### 21 **Inhibition of HLRCC spheroid growth by EZH2 inhibitors**

22 For tumor spheroid formation, a total of 5000 single cell suspensions were plated in 100 µL of  
23 complete media (DMEM supplemented with 20% FBS, 1x MEM non-essential amino acids, and 1x  
24 Anti-Anti) into each well of a 96-well ultra-low attachment plates (Corning 3603). After 3 days in  
25 culture, tumor spheroid formation was confirmed visually using the EVOS XL Core Cell Imaging

1 System (Thermo Fisher Scientific). On day 0, 100  $\mu$ L of media containing 2x concentration of  
2 EPZ6438 was added to the wells diluting the compound to the indicated concentration. Every 3 or 4  
3 days, 100  $\mu$ L of media was removed and replaced with 100  $\mu$ L of media with 2x concentration of  
4 EPZ6438. The spheroids were treated for 21 days. The spheroids were then dissociated with Cell  
5 Titer Glo 3D (Promega # G9681) following manufacturer's instructions. The plates were then read  
6 on an Enspire Multimode Plate Reader (Perkin-Elmer).

7

#### 8 **Analysis of SWI/SNF complex composition by glycerol gradient fractionation in HLRCC cells**

9 UOK262 *FH*<sup>-/-</sup> and *FH*<sup>+/+</sup> rescue cells were grown to 90% confluency in 2 x 15 cm dishes per cell  
10 line. Cells were harvested by trypsinization and washed once in ice-cold PBS. Nuclei were isolated  
11 by incubating the cell pellets in Buffer A (20 mM HEPES pH 7.9, 25 mM KCl, 10% glycerol, 0.1%  
12 NP-40, 1 mM DTT with PMSF, aprotinin, leupeptin and pepstatin) for 7 min. Nuclei were pelleted and  
13 washed in buffer A without NP-40. Washed and pelleted nuclei were resuspended in Buffer C (10  
14 mM HEPES, pH 7.6, 3 mM MgCl<sub>2</sub>, 100 mM KCl, 0.1 mM EDTA, 10% glycerol, 1 mM DTT with PMSF,  
15 aprotinin, leupeptin and pepstatin). Ammonium sulfate was added to 0.3 M final concentration.  
16 Samples were incubated in a rotating wheel at 4 °C for 30 min and cleared by ultracentrifugation  
17 (150000 rcf x 30 min). 300 mg of ammonium sulfate powder was introduced per mL of cleared lysate.  
18 After ice incubation for 20 min, proteins were precipitated by ultracentrifugation (150000 rcf x 30  
19 min). Pelleted proteins were resuspended in 100  $\mu$ L HEMG1000 buffer (25 mM HEPES pH 7.6, 0.1  
20 mM EDTA, 12.5 mM MgCl<sub>2</sub>, 100 mM KCl, 1 mM DTT with PMSF, aprotinin, leupeptin and pepstatin).  
21 400  $\mu$ g of resuspended proteins were layered over 10 mL, 10-30% glycerol gradient, prepared with  
22 HMG1000 buffer without glycerol or with 30% glycerol, and separated by centrifugation at 40000 rpm  
23 (Beckman Coulter XL-100K, Brea, CA) for 16 h using SW32Ti rotor (Beckman Coulter, Brea, CA).  
24 500  $\mu$ L-fractions were collected and analyzed by western blotting using antibodies against BRG1  
25 (Abcam, ab110641) and SNF5 (Santa Cruz Biotechnology, sc-166165).

1 **Contributions**

2

3 R.A.K., D.W.B., and J.L.M. designed experiments. R.A.K. and D.W.B. performed all chemical  
4 proteomic labeling and enrichment experiments. D.W.B. performed all LC-MS/MS studies and  
5 stoichiometry analyses of IA-alkyne enrichment experiments. R.A.K. and A.B. synthesized  
6 compounds. R.A.K. and S.B. performed all cell-based analyses. C.B. assisted with cell-based  
7 analyses and performed S-succination reversibility studies. J.H.S. performed co-  
8 immunoprecipitation experiments. J.L.M., D.B., A.T., and R.A.K. performed bioinformatics  
9 analyses. D.W. and W.M.L. performed HLRCC spheroid growth inhibition studies and assisted with  
10 SWI/SNF analyses. A.A. and E.C.D. performed glycerol gradient fractionation and analysis of  
11 SWI/SNF complex in HLRCC cell lines. N.F. provided the S-succination antibody. W.M.L. provided  
12 HLRCC cell lines and advised experimental design. M.P.W., L.F., and M.L. performed whole  
13 proteome MUDPIT analyses of HLRCC cells for S-succination validation. R.A.K. and J.L.M.  
14 analyzed data and wrote the manuscript with input from all authors.

15

16 **Acknowledgements**

17

18 The authors thank Dr. Carissa Grose (Protein Expression Laboratory) for assisting with cloning and  
19 preparation of plasmid DNA, Dr. Trevor Archer (Epigenetics & Stem Cell Biology Laboratory, NIEHS)  
20 for the kind gift of the SMARCC1 and SNF5 plasmids, Allison Roberts, Julie Garlick, and Dr. Thomas  
21 Zengeya (Chemical Biology Laboratory, NCI) for assisting with preliminary studies, and Dr. Dan  
22 Crooks and Dr. Chris Ricketts (Urologic Oncology Branch, NCI) for helpful discussions. This work  
23 was supported by the Intramural Research Program of the NIH, National Cancer Institute, Center for  
24 Cancer Research (ZIA BC011488-04).

25

26 **References**

- 1 1. Baysal, B. E.; Ferrell, R. E.; Willett-Brozick, J. E.; Lawrence, E. C.; Myssiorek, D.; Bosch, A.;  
2 van der Mey, A.; Taschner, P. E.; Rubinstein, W. S.; Myers, E. N.; Richard, C. W., 3rd;  
3 Cornelisse, C. J.; Devilee, P.; Devlin, B., Mutations in SDHD, a mitochondrial complex II  
4 gene, in hereditary paraganglioma. *Science* **2000**, 287 (5454), 848-51.
- 5 2. Launonen, V.; Vierimaa, O.; Kiuru, M.; Isola, J.; Roth, S.; Pukkala, E.; Sistonen, P.; Herva,  
6 R.; Aaltonen, L. A., Inherited susceptibility to uterine leiomyomas and renal cell cancer. *Proc*  
7 *Natl Acad Sci U S A* **2001**, 98 (6), 3387-92.
- 8 3. Tomlinson, I. P.; Alam, N. A.; Rowan, A. J.; Barclay, E.; Jaeger, E. E.; Kelsell, D.; Leigh, I.;  
9 Gorman, P.; Lamlum, H.; Rahman, S.; Roylance, R. R.; Olpin, S.; Bevan, S.; Barker, K.;  
10 Hearle, N.; Houlston, R. S.; Kiuru, M.; Lehtonen, R.; Karhu, A.; Vilkki, S.; Laiho, P.; Eklund,  
11 C.; Vierimaa, O.; Aittomaki, K.; Hietala, M.; Sistonen, P.; Paetau, A.; Salovaara, R.; Herva,  
12 R.; Launonen, V.; Aaltonen, L. A.; Multiple Leiomyoma, C., Germline mutations in FH  
13 predispose to dominantly inherited uterine fibroids, skin leiomyomata and papillary renal cell  
14 cancer. *Nat Genet* **2002**, 30 (4), 406-10.
- 15 4. Mardis, E. R.; Ding, L.; Dooling, D. J.; Larson, D. E.; McLellan, M. D.; Chen, K.; Koboldt, D.  
16 C.; Fulton, R. S.; Delehaanty, K. D.; McGrath, S. D.; Fulton, L. A.; Locke, D. P.; Magrini, V.  
17 J.; Abbott, R. M.; Vickery, T. L.; Reed, J. S.; Robinson, J. S.; Wylie, T.; Smith, S. M.;  
18 Carmichael, L.; Eldred, J. M.; Harris, C. C.; Walker, J.; Peck, J. B.; Du, F.; Dukes, A. F.;  
19 Sanderson, G. E.; Brummett, A. M.; Clark, E.; McMichael, J. F.; Meyer, R. J.; Schindler, J.  
20 K.; Pohl, C. S.; Wallis, J. W.; Shi, X.; Lin, L.; Schmidt, H.; Tang, Y.; Haipok, C.; Wiechert, M.  
21 E.; Ivy, J. V.; Kalicki, J.; Elliott, G.; Ries, R. E.; Payton, J. E.; Westervelt, P.; Tomasson, M.  
22 H.; Watson, M. A.; Baty, J.; Heath, S.; Shannon, W. D.; Nagarajan, R.; Link, D. C.; Walter,  
23 M. J.; Graubert, T. A.; DiPersio, J. F.; Wilson, R. K.; Ley, T. J., Recurring mutations found by  
24 sequencing an acute myeloid leukemia genome. *N Engl J Med* **2009**, 361 (11), 1058-66.
- 25 5. Yan, H.; Parsons, D. W.; Jin, G.; McLendon, R.; Rasheed, B. A.; Yuan, W.; Kos, I.; Batinic-  
26 Haberle, I.; Jones, S.; Riggins, G. J.; Friedman, H.; Friedman, A.; Reardon, D.; Herndon, J.;  
27 Kinzler, K. W.; Velculescu, V. E.; Vogelstein, B.; Bigner, D. D., IDH1 and IDH2 mutations in  
28 gliomas. *N Engl J Med* **2009**, 360 (8), 765-73.
- 29 6. Yang, M.; Soga, T.; Pollard, P. J., Oncometabolites: linking altered metabolism with cancer.  
30 *The Journal of clinical investigation* **2013**, 123 (9), 3652-8.
- 31 7. Isaacs, J. S.; Jung, Y. J.; Mole, D. R.; Lee, S.; Torres-Cabala, C.; Chung, Y. L.; Merino, M.;  
32 Trepel, J.; Zbar, B.; Toro, J.; Ratcliffe, P. J.; Linehan, W. M.; Neckers, L., HIF overexpression  
33 correlates with biallelic loss of fumarate hydratase in renal cancer: novel role of fumarate in  
34 regulation of HIF stability. *Cancer Cell* **2005**, 8 (2), 143-53.
- 35 8. Pollard, P. J.; Briere, J. J.; Alam, N. A.; Barwell, J.; Barclay, E.; Wortham, N. C.; Hunt, T.;  
36 Mitchell, M.; Olpin, S.; Moat, S. J.; Hargreaves, I. P.; Heales, S. J.; Chung, Y. L.; Griffiths, J.  
37 R.; Dalglish, A.; McGrath, J. A.; Gleeson, M. J.; Hodgson, S. V.; Poulson, R.; Rustin, P.;  
38 Tomlinson, I. P., Accumulation of Krebs cycle intermediates and over-expression of  
39 HIF1alpha in tumours which result from germline FH and SDH mutations. *Hum Mol Genet*  
40 **2005**, 14 (15), 2231-9.
- 41 9. Meier, J. L., Metabolic mechanisms of epigenetic regulation. *ACS chemical biology* **2013**, 8  
42 (12), 2607-21.
- 43 10. MacKenzie, E. D.; Selak, M. A.; Tennant, D. A.; Payne, L. J.; Crosby, S.; Frederiksen, C. M.;  
44 Watson, D. G.; Gottlieb, E., Cell-permeating alpha-ketoglutarate derivatives alleviate  
45 pseudohypoxia in succinate dehydrogenase-deficient cells. *Mol Cell Biol* **2007**, 27 (9), 3282-  
46 9.
- 47 11. Hewitson, K. S.; Lienard, B. M.; McDonough, M. A.; Clifton, I. J.; Butler, D.; Soares, A. S.;  
48 Oldham, N. J.; McNeill, L. A.; Schofield, C. J., Structural and mechanistic studies on the  
49 inhibition of the hypoxia-inducible transcription factor hydroxylases by tricarboxylic acid cycle  
50 intermediates. *J Biol Chem* **2007**, 282 (5), 3293-301.



- 1 12. Zengeya, T. T.; Kulkarni, R. A.; Meier, J. L., Modular synthesis of cell-permeating 2-  
2 ketoglutarate esters. *Org Lett* **2015**, *17* (10), 2326-9.
- 3 13. Laukka, T.; Mariani, C. J.; Ihtola, T.; Cao, J. Z.; Hokkanen, J.; Kaelin, W. G., Jr.; Godley,  
4 L. A.; Koivunen, P., Fumarate and Succinate Regulate Expression of Hypoxia-inducible  
5 Genes via TET Enzymes. *J Biol Chem* **2016**, *291* (8), 4256-65.
- 6 14. Sciacovelli, M.; Goncalves, E.; Johnson, T. I.; Zecchini, V. R.; da Costa, A. S.; Gaude, E.;  
7 Drubbel, A. V.; Theobald, S. J.; Abbo, S. R.; Tran, M. G.; Rajeeve, V.; Cardaci, S.; Foster,  
8 S.; Yun, H.; Cutillas, P.; Warren, A.; Gnanapragasam, V.; Gottlieb, E.; Franze, K.; Huntly, B.;  
9 Maher, E. R.; Maxwell, P. H.; Saez-Rodriguez, J.; Frezza, C., Fumarate is an epigenetic  
10 modifier that elicits epithelial-to-mesenchymal transition. *Nature* **2016**, *537* (7621), 544-547.
- 11 15. Alderson, N. L.; Wang, Y.; Blatnik, M.; Frizzell, N.; Walla, M. D.; Lyons, T. J.; Alt, N.; Carson,  
12 J. A.; Nagai, R.; Thorpe, S. R.; Baynes, J. W., S-(2-Succinyl)cysteine: a novel chemical  
13 modification of tissue proteins by a Krebs cycle intermediate. *Arch Biochem Biophys* **2006**,  
14 *450* (1), 1-8.
- 15 16. Lin, H.; Su, X.; He, B., Protein lysine acylation and cysteine succination by intermediates of  
16 energy metabolism. *ACS chemical biology* **2012**, *7* (6), 947-60.
- 17 17. Sullivan, L. B.; Martinez-Garcia, E.; Nguyen, H.; Mullen, A. R.; Dufour, E.; Sudarshan, S.;  
18 Licht, J. D.; Deberardinis, R. J.; Chandel, N. S., The proto-oncometabolite fumarate binds  
19 glutathione to amplify ROS-dependent signaling. *Mol Cell* **2013**, *51* (2), 236-48.
- 20 18. Sullivan, L. B.; Gui, D. Y.; Heiden, M. G. V., Altered metabolite levels in cancer: implications  
21 for tumour biology and cancer therapy. *Nat Rev Cancer* **2016**, *16* (11), 680-693.
- 22 19. Kinch, L.; Grishin, N. V.; Brugarolas, J., Succination of Keap1 and activation of Nrf2-  
23 dependent antioxidant pathways in FH-deficient papillary renal cell carcinoma type 2. *Cancer*  
24 *Cell* **2011**, *20* (4), 418-20.
- 25 20. Bardella, C.; El-Bahrawy, M.; Frizzell, N.; Adam, J.; Ternette, N.; Hatipoglu, E.; Howarth, K.;  
26 O'Flaherty, L.; Roberts, I.; Turner, G.; Taylor, J.; Giaslakitotis, K.; Macaulay, V. M.; Harris, A.  
27 L.; Chandra, A.; Lehtonen, H. J.; Launonen, V.; Aaltonen, L. A.; Pugh, C. W.; Mihai, R.;  
28 Trudgian, D.; Kessler, B.; Baynes, J. W.; Ratcliffe, P. J.; Tomlinson, I. P.; Pollard, P. J.,  
29 Aberrant succination of proteins in fumarate hydratase-deficient mice and HLRCC patients is  
30 a robust biomarker of mutation status. *J Pathol* **2011**, *225* (1), 4-11.
- 31 21. Merkley, E. D.; Metz, T. O.; Smith, R. D.; Baynes, J. W.; Frizzell, N., The Succinated  
32 Proteome. *Mass Spectrom Rev* **2014**, *33* (2), 98-109.
- 33 22. Piroli, G. G.; Manuel, A. M.; Clapper, A. C.; Walla, M. D.; Baatz, J. E.; Palmiter, R. D.;  
34 Quintana, A.; Frizzell, N., Succination is Increased on Select Proteins in the Brainstem of the  
35 NADH dehydrogenase (ubiquinone) Fe-S protein 4 (Ndufs4) Knockout Mouse, a Model of  
36 Leigh Syndrome. *Mol Cell Proteomics* **2016**, *15* (2), 445-461.
- 37 23. Adam, J.; Ramracheya, R.; Chibalina, M. V.; Ternette, N.; Hamilton, A.; Tarasov, A. I.; Zhang,  
38 Q.; Rebelato, E.; Rorsman, N. J. G.; Martin-del-Rio, R.; Lewis, A.; Ozkan, G.; Do, H. W.;  
39 Spegel, P.; Saitoh, K.; Kato, K.; Igarashi, K.; Kessler, B. M.; Pugh, C. W.; Tamarit-Rodriguez,  
40 J.; Mulder, H.; Clark, A.; Frizzell, N.; Soga, T.; Ashcroft, F. M.; Silver, A.; Pollard, P. J.;  
41 Rorsman, P., Fumarate Hydratase Deletion in Pancreatic beta Cells Leads to Progressive  
42 Diabetes. *Cell Rep* **2017**, *20* (13), 3135-3148.
- 43 24. Yang, M.; Ternette, N.; Su, H. H.; Dabiri, R.; Kessler, B. M.; Adam, J.; Teh, B. T.; Pollard, P.  
44 J., The Succinated Proteome of FH-Mutant Tumours. *Metabolites* **2014**, *4* (3), 640-654.
- 45 25. Ternette, N.; Yang, M.; Laroyia, M.; Kitagawa, M.; O'Flaherty, L.; Wolhuter, K.; Igarashi, K.;  
46 Saito, K.; Kato, K.; Fischer, R.; Berquand, A.; Kessler, B. M.; Lappin, T.; Frizzell, N.; Soga,  
47 T.; Adam, J.; Pollard, P. J., Inhibition of Mitochondrial Aconitase by Succination in Fumarate  
48 Hydratase Deficiency. *Cell Rep* **2013**, *3* (3), 689-700.
- 49 26. Weerapana, E.; Wang, C.; Simon, G. M.; Richter, F.; Khare, S.; Dillon, M. B.; Bachovchin, D.  
50 A.; Mowen, K.; Baker, D.; Cravatt, B. F., Quantitative reactivity profiling predicts functional  
51 cysteines in proteomes. *Nature* **2010**, *468* (7325), 790-5.

- 1 27. Wright, M. H.; Sieber, S. A., Chemical proteomics approaches for identifying the cellular  
2 targets of natural products. *Nat Prod Rep* **2016**, 33 (5), 681-708.
- 3 28. Backus, K. M.; Correia, B. E.; Lum, K. M.; Forli, S.; Horning, B. D.; Gonzalez-Paez, G. E.;  
4 Chatterjee, S.; Lanning, B. R.; Teijaro, J. R.; Olson, A. J.; Wolan, D. W.; Cravatt, B. F.,  
5 Proteome-wide covalent ligand discovery in native biological systems. *Nature* **2016**, 534  
6 (7608), 570-+.
- 7 29. Lannine, B. R.; Whitby, L. R.; Dix, M. M.; Douhan, J.; Gilbert, A. M.; Hett, E. C.; Johnson, T.;  
8 Joslyn, C.; Kath, J. C.; Niessen, S.; Roberts, L. R.; Schnute, M. E.; Wang, C.; Hulce, J. J.;  
9 Wei, B. X.; Whiteley, L. O.; Hayward, M. M.; Cravatt, B. F., A road map to evaluate the  
10 proteome-wide selectivity of covalent kinase inhibitors. *Nat Chem Biol* **2014**, 10 (9), 760-767.
- 11 30. Blewett, M. M.; Xie, J. J.; Zaro, B. W.; Backus, K. M.; Altman, A.; Teijaro, J. R.; Cravatt, B.  
12 F., Chemical proteomic map of dimethyl fumarate-sensitive cysteines in primary human T  
13 cells. *Sci Signal* **2016**, 9 (445).
- 14 31. Schmidt, T. J.; Ak, M.; Mrowietz, U., Reactivity of dimethyl fumarate and methylhydrogen  
15 fumarate towards glutathione and N-acetyl-L-cysteine--preparation of S-substituted  
16 thiosuccinic acid esters. *Bioorg Med Chem* **2007**, 15 (1), 333-42.
- 17 32. Zhou, Y.; Wynia-Smith, S. L.; Couvertier, S. M.; Kalous, K. S.; Marletta, M. A.; Smith, B. C.;  
18 Weerapana, E., Chemoproteomic Strategy to Quantitatively Monitor Transnitrosation  
19 Uncovers Functionally Relevant S-Nitrosation Sites on Cathepsin D and HADH2. *Cell Chem*  
20 *Biol* **2016**, 23 (6), 727-37.
- 21 33. Bak, D. W.; Pizzagalli, M. D.; Weerapana, E., Identifying Functional Cysteine Residues in the  
22 Mitochondria. *ACS chemical biology* **2017**, 12 (4), 947-957.
- 23 34. Yang, Y.; Valera, V. A.; Padilla-Nash, H. M.; Sourbier, C.; Vocke, C. D.; Vira, M. A.; Abu-  
24 Asab, M. S.; Bratslavsky, G.; Tsokos, M.; Merino, M. J.; Pinto, P. A.; Srinivasan, R.; Ried, T.;  
25 Neckers, L.; Linehan, W. M., UOK 262 cell line, fumarate hydratase deficient (FH/FH-)  
26 hereditary leiomyomatosis renal cell carcinoma: in vitro and in vivo model of an aberrant  
27 energy metabolic pathway in human cancer. *Cancer Genet Cytogenet* **2010**, 196 (1), 45-55.
- 28 35. Bar-Peled, L.; Kemper, E. K.; Suci, R. M.; Vinogradova, E. V.; Backus, K. M.; Horning, B.  
29 D.; Paul, T. A.; Ichu, T. A.; Svensson, R. U.; Olucha, J.; Chang, M. W.; Kok, B. P.; Zhu, Z.;  
30 Ihle, N. T.; Dix, M. M.; Jiang, P.; Hayward, M. M.; Saez, E.; Shaw, R. J.; Cravatt, B. F.,  
31 Chemical Proteomics Identifies Druggable Vulnerabilities in a Genetically Defined Cancer.  
32 *Cell* **2017**, 171 (3), 696-709 e23.
- 33 36. O'Shea, J. P.; Chou, M. F.; Quader, S. A.; Ryan, J. K.; Church, G. M.; Schwartz, D., pLogo:  
34 a probabilistic approach to visualizing sequence motifs. *Nat Methods* **2013**, 10 (12), 1211-2.
- 35 37. Wang, C.; Weerapana, E.; Blewett, M. M.; Cravatt, B. F., A chemoproteomic platform to  
36 quantitatively map targets of lipid-derived electrophiles. *Nat Methods* **2014**, 11 (1), 79-85.
- 37 38. Zenggeya, T. T.; Garlick, J. M.; Kulkarni, R. A.; Miley, M.; Roberts, A. M.; Yang, Y.; Crooks, D.  
38 R.; Sourbier, C.; Linehan, W. M.; Meier, J. L., Co-opting a Bioorthogonal Reaction for  
39 Oncometabolite Detection. *J Am Chem Soc* **2016**, 138 (49), 15813-15816.
- 40 39. Lin, D.; Saleh, S.; Liebler, D. C., Reversibility of covalent electrophile-protein adducts and  
41 chemical toxicity. *Chem Res Toxicol* **2008**, 21 (12), 2361-9.
- 42 40. Fontaine, S. D.; Reid, R.; Robinson, L.; Ashley, G. W.; Santi, D. V., Long-term stabilization  
43 of maleimide-thiol conjugates. *Bioconjug Chem* **2015**, 26 (1), 145-52.
- 44 41. Snyder, G. H.; Cennerazzo, M. J.; Karalis, A. J.; Field, D., Electrostatic influence of local  
45 cysteine environments on disulfide exchange kinetics. *Biochemistry* **1981**, 20 (23), 6509-19.
- 46 42. Britto, P. J.; Knipling, L.; Wolff, J., The local electrostatic environment determines cysteine  
47 reactivity of tubulin. *J Biol Chem* **2002**, 277 (32), 29018-27.
- 48 43. Stauffer, D. A.; Karlin, A., Electrostatic potential of the acetylcholine binding sites in the  
49 nicotinic receptor probed by reactions of binding-site cysteines with charged  
50 methanethiosulfonates. *Biochemistry* **1994**, 33 (22), 6840-9.



- 1 44. Reva, B.; Antipin, Y.; Sander, C., Predicting the functional impact of protein mutations:  
2 application to cancer genomics. *Nucleic Acids Res* **2011**, *39* (17), e118.
- 3 45. Gao, J.; Aksoy, B. A.; Dogrusoz, U.; Dresdner, G.; Gross, B.; Sumer, S. O.; Sun, Y.;  
4 Jacobsen, A.; Sinha, R.; Larsson, E.; Cerami, E.; Sander, C.; Schultz, N., Integrative analysis  
5 of complex cancer genomics and clinical profiles using the cBioPortal. *Sci Signal* **2013**, *6*  
6 (269), p11.
- 7 46. Kadoch, C.; Crabtree, G. R., Mammalian SWI/SNF chromatin remodeling complexes and  
8 cancer: Mechanistic insights gained from human genomics. *Sci Adv* **2015**, *1* (5), e1500447.
- 9 47. DelBove, J.; Rosson, G.; Strobeck, M.; Chen, J.; Archer, T. K.; Wang, W.; Knudsen, E. S.;  
10 Weissman, B. E., Identification of a core member of the SWI/SNF complex,  
11 BAF155/SMARCC1, as a human tumor suppressor gene. *Epigenetics* **2011**, *6* (12), 1444-53.
- 12 48. Brugarolas, J., PBRM1 and BAP1 as novel targets for renal cell carcinoma. *Cancer J* **2013**,  
13 *19* (4), 324-32.
- 14 49. Sohn, D. H.; Lee, K. Y.; Lee, C.; Oh, J.; Chung, H.; Jeon, S. H.; Seong, R. H., SRG3 interacts  
15 directly with the major components of the SWI/SNF chromatin remodeling complex and  
16 protects them from proteasomal degradation. *J Biol Chem* **2007**, *282* (14), 10614-24.
- 17 50. Yan, L.; Xie, S.; Du, Y.; Qian, C., Structural Insights into BAF47 and BAF155 Complex  
18 Formation. *J Mol Biol* **2017**, *429* (11), 1650-1660.
- 19 51. Keppler, B. R.; Archer, T. K., Ubiquitin-dependent and ubiquitin-independent control of  
20 subunit stoichiometry in the SWI/SNF complex. *J Biol Chem* **2010**, *285* (46), 35665-74.
- 21 52. Knutson, S. K.; Warholic, N. M.; Wigle, T. J.; Klaus, C. R.; Allain, C. J.; Raimondi, A.; Porter  
22 Scott, M.; Chesworth, R.; Moyer, M. P.; Copeland, R. A.; Richon, V. M.; Pollock, R. M.; Kuntz,  
23 K. W.; Keilhack, H., Durable tumor regression in genetically altered malignant rhabdoid  
24 tumors by inhibition of methyltransferase EZH2. *Proc Natl Acad Sci U S A* **2013**, *110* (19),  
25 7922-7.
- 26 53. Harmel, R.; Fiedler, D., Features and regulation of non-enzymatic post-translational  
27 modifications. *Nat Chem Biol* **2018**, *14* (3), 244-252.
- 28 54. Subramanian, A.; Tamayo, P.; Mootha, V. K.; Mukherjee, S.; Ebert, B. L.; Gillette, M. A.;  
29 Paulovich, A.; Pomeroy, S. L.; Golub, T. R.; Lander, E. S.; Mesirov, J. P., Gene set  
30 enrichment analysis: a knowledge-based approach for interpreting genome-wide expression  
31 profiles. *Proc Natl Acad Sci U S A* **2005**, *102* (43), 15545-50.
- 32 55. Erez, A.; DeBerardinis, R. J., Metabolic dysregulation in monogenic disorders and cancer -  
33 finding method in madness. *Nat Rev Cancer* **2015**, *15* (7), 440-8.
- 34 56. Yang, J.; Gupta, V.; Carroll, K. S.; Liebler, D. C., Site-specific mapping and quantification of  
35 protein S-sulphenylation in cells. *Nat Commun* **2014**, *5*, 4776.
- 36 57. Strelko, C. L.; Lu, W.; Dufort, F. J.; Seyfried, T. N.; Chiles, T. C.; Rabinowitz, J. D.; Roberts,  
37 M. F., Itaconic acid is a mammalian metabolite induced during macrophage activation. *J Am*  
38 *Chem Soc* **2011**, *133* (41), 16386-9.
- 39 58. Lampropoulou, V.; Sergushichev, A.; Bambouskova, M.; Nair, S.; Vincent, E. E.; Loginicheva,  
40 E.; Cervantes-Barragan, L.; Ma, X.; Huang, S. C.; Griss, T.; Weinheimer, C. J.; Khader, S.;  
41 Randolph, G. J.; Pearce, E. J.; Jones, R. G.; Diwan, A.; Diamond, M. S.; Artyomov, M. N.,  
42 Itaconate Links Inhibition of Succinate Dehydrogenase with Macrophage Metabolic  
43 Remodeling and Regulation of Inflammation. *Cell Metab* **2016**, *24* (1), 158-66.
- 44 59. Kulkarni, R. A.; Worth, A. J.; Zenggeya, T. T.; Shrimp, J. H.; Garlick, J. M.; Roberts, A. M.;  
45 Montgomery, D. C.; Sourbier, C.; Gibbs, B. K.; Mesaros, C.; Tsai, Y. C.; Das, S.; Chan, K.  
46 C.; Zhou, M.; Andresson, T.; Weissman, A. M.; Linehan, W. M.; Blair, I. A.; Snyder, N. W.;  
47 Meier, J. L., Discovering Targets of Non-enzymatic Acylation by Thioester Reactivity  
48 Profiling. *Cell Chem Biol* **2017**, *24* (2), 231-242.
- 49 60. Wagner, G. R.; Bhatt, D. P.; O'Connell, T. M.; Thompson, J. W.; Dubois, L. G.; Backos, D.  
50 S.; Yang, H.; Mitchell, G. A.; Ilkayeva, O. R.; Stevens, R. D.; Grimsrud, P. A.; Hirschey, M.

- 1 D., A Class of Reactive Acyl-CoA Species Reveals the Non-enzymatic Origins of Protein  
2 Acylation. *Cell Metab* **2017**, 25 (4), 823-837 e8.
- 3 61. Muller, F. L.; Aquilanti, E. A.; DePinho, R. A., Collateral Lethality: A new therapeutic strategy  
4 in oncology. *Trends Cancer* **2015**, 1 (3), 161-173.
- 5 62. Farmer, H.; McCabe, N.; Lord, C. J.; Tutt, A. N.; Johnson, D. A.; Richardson, T. B.; Santarosa,  
6 M.; Dillon, K. J.; Hickson, I.; Knights, C.; Martin, N. M.; Jackson, S. P.; Smith, G. C.; Ashworth,  
7 A., Targeting the DNA repair defect in BRCA mutant cells as a therapeutic strategy. *Nature*  
8 **2005**, 434 (7035), 917-21.
- 9 63. Chan, S. M.; Thomas, D.; Corces-Zimmerman, M. R.; Xavy, S.; Rastogi, S.; Hong, W. J.;  
10 Zhao, F.; Medeiros, B. C.; Tyvoll, D. A.; Majeti, R., Isocitrate dehydrogenase 1 and 2  
11 mutations induce BCL-2 dependence in acute myeloid leukemia. *Nat Med* **2015**, 21 (2), 178-  
12 84.
- 13 64. Fu, X.; Chin, R. M.; Vergnes, L.; Hwang, H.; Deng, G.; Xing, Y.; Pai, M. Y.; Li, S.; Ta, L.;  
14 Fazlollahi, F.; Chen, C.; Prins, R. M.; Teitell, M. A.; Nathanson, D. A.; Lai, A.; Faull, K. F.;  
15 Jiang, M.; Clarke, S. G.; Cloughesy, T. F.; Graeber, T. G.; Braas, D.; Christofk, H. R.; Jung,  
16 M. E.; Reue, K.; Huang, J., 2-Hydroxyglutarate Inhibits ATP Synthase and mTOR Signaling.  
17 *Cell Metab* **2015**, 22 (3), 508-15.
- 18 65. Frezza, C.; Zheng, L.; Folger, O.; Rajagopalan, K. N.; MacKenzie, E. D.; Jerby, L.; Micaroni,  
19 M.; Chaneton, B.; Adam, J.; Hedley, A.; Kalna, G.; Tomlinson, I. P.; Pollard, P. J.; Watson,  
20 D. G.; Deberardinis, R. J.; Shlomi, T.; Ruppin, E.; Gottlieb, E., Haem oxygenase is  
21 synthetically lethal with the tumour suppressor fumarate hydratase. *Nature* **2011**, 477 (7363),  
22 225-8.
- 23 66. Nagai, R.; Brock, J. W.; Blatnik, M.; Baatz, J. E.; Bethard, J.; Walla, M. D.; Thorpe, S. R.;  
24 Baynes, J. W.; Frizzell, N., Succination of protein thiols during adipocyte maturation: a  
25 biomarker of mitochondrial stress. *J Biol Chem* **2007**, 282 (47), 34219-28.
- 26 67. Cancer Genome Atlas Research, N.; Linehan, W. M.; Spellman, P. T.; Ricketts, C. J.;  
27 Creighton, C. J.; Fei, S. S.; Davis, C.; Wheeler, D. A.; Murray, B. A.; Schmidt, L.; Vocke, C.  
28 D.; Peto, M.; Al Mamun, A. A.; Shinbrot, E.; Sethi, A.; Brooks, S.; Rathmell, W. K.; Brooks,  
29 A. N.; Hoadley, K. A.; Robertson, A. G.; Brooks, D.; Bowlby, R.; Sadeghi, S.; Shen, H.;  
30 Weisenberger, D. J.; Bootwalla, M.; Baylin, S. B.; Laird, P. W.; Cherniack, A. D.; Saksena,  
31 G.; Haake, S.; Li, J.; Liang, H.; Lu, Y.; Mills, G. B.; Akbani, R.; Leiserson, M. D.; Raphael, B.  
32 J.; Anur, P.; Bottaro, D.; Albiges, L.; Barnabas, N.; Choueiri, T. K.; Czerniak, B.; Godwin, A.  
33 K.; Hakimi, A. A.; Ho, T. H.; Hsieh, J.; Ittmann, M.; Kim, W. Y.; Krishnan, B.; Merino, M. J.;  
34 Mills Shaw, K. R.; Reuter, V. E.; Reznik, E.; Shelley, C. S.; Shuch, B.; Signoretti, S.;  
35 Srinivasan, R.; Tamboli, P.; Thomas, G.; Tickoo, S.; Burnett, K.; Crain, D.; Gardner, J.; Lau,  
36 K.; Mallery, D.; Morris, S.; Paulauskis, J. D.; Penny, R. J.; Shelton, C.; Shelton, W. T.;  
37 Sherman, M.; Thompson, E.; Yena, P.; Avedon, M. T.; Bowen, J.; Gastier-Foster, J. M.;  
38 Gerken, M.; Leraas, K. M.; Lichtenberg, T. M.; Ramirez, N. C.; Santos, T.; Wise, L.; Zmuda,  
39 E.; Demchok, J. A.; Felau, I.; Hutter, C. M.; Sheth, M.; Sofia, H. J.; Tarnuzzer, R.; Wang, Z.;  
40 Yang, L.; Zenklusen, J. C.; Zhang, J.; Ayala, B.; Baboud, J.; Chudamani, S.; Liu, J.; Lolla, L.;  
41 Naresh, R.; Pihl, T.; Sun, Q.; Wan, Y.; Wu, Y.; Ally, A.; Balasundaram, M.; Balu, S.;  
42 Beroukhim, R.; Bodenheimer, T.; Buhay, C.; Butterfield, Y. S.; Carlsen, R.; Carter, S. L.;  
43 Chao, H.; Chuah, E.; Clarke, A.; Covington, K. R.; Dahdouli, M.; Dewal, N.; Dhalla, N.;  
44 Doddapaneni, H. V.; Drummond, J. A.; Gabriel, S. B.; Gibbs, R. A.; Guin, R.; Hale, W.;  
45 Hawes, A.; Hayes, D. N.; Holt, R. A.; Hoyle, A. P.; Jefferys, S. R.; Jones, S. J.; Jones, C. D.;  
46 Kalra, D.; Kovar, C.; Lewis, L.; Li, J.; Ma, Y.; Marra, M. A.; Mayo, M.; Meng, S.; Meyerson,  
47 M.; Mieczkowski, P. A.; Moore, R. A.; Morton, D.; Mose, L. E.; Mungall, A. J.; Muzny, D.;  
48 Parker, J. S.; Perou, C. M.; Roach, J.; Schein, J. E.; Schumacher, S. E.; Shi, Y.; Simons, J.  
49 V.; Sipahimalani, P.; Skelly, T.; Soloway, M. G.; Sougnez, C.; Tam, A.; Tan, D.; Thiessen,  
50 N.; Veluvolu, U.; Wang, M.; Wilkerson, M. D.; Wong, T.; Wu, J.; Xi, L.; Zhou, J.; Bedford, J.;  
51 Chen, F.; Fu, Y.; Gerstein, M.; Haussler, D.; Kasaian, K.; Lai, P.; Ling, S.; Radenbaugh, A.

- 1 Van Den Berg, D.; Weinstein, J. N.; Zhu, J.; Albert, M.; Alexopoulou, I.; Andersen, J. J.;  
2 Auman, J. T.; Bartlett, J.; Bastacky, S.; Bergsten, J.; Blute, M. L.; Boice, L.; Bollag, R. J.;  
3 Boyd, J.; Castle, E.; Chen, Y. B.; Cheville, J. C.; Curley, E.; Davies, B.; DeVolk, A.; Dhir, R.;  
4 Dike, L.; Eckman, J.; Engel, J.; Harr, J.; Hrebinko, R.; Huang, M.; Huelsenbeck-Dill, L.;  
5 Iacocca, M.; Jacobs, B.; Lobis, M.; Maranchie, J. K.; McMeekin, S.; Myers, J.; Nelson, J.;  
6 Parfitt, J.; Parwani, A.; Petrelli, N.; Rabeno, B.; Roy, S.; Salner, A. L.; Slaton, J.; Stanton, M.;  
7 Thompson, R. H.; Thorne, L.; Tucker, K.; Weinberger, P. M.; Winemiller, C.; Zach, L. A.;  
8 Zuna, R., Comprehensive Molecular Characterization of Papillary Renal-Cell Carcinoma. *N*  
9 *Engl J Med* **2016**, *374* (2), 135-45.
- 10 68. Lehtonen, H. J.; Kiuru, M.; Ylisaukko-Oja, S. K.; Salovaara, R.; Herva, R.; Koivisto, P. A.;  
11 Vierimaa, O.; Aittomaki, K.; Pukkala, E.; Launonen, V.; Aaltonen, L. A., Increased risk of  
12 cancer in patients with fumarate hydratase germline mutation. *J Med Genet* **2006**, *43* (6),  
13 523-6.
- 14 69. Fieuw, A.; Kumps, C.; Schramm, A.; Pattyn, F.; Menten, B.; Antonacci, F.; Sudmant, P.;  
15 Schulte, J. H.; Van Roy, N.; Vergult, S.; Buckley, P. G.; De Paepe, A.; Noguera, R.; Versteeg,  
16 R.; Stallings, R.; Eggert, A.; Vandesompele, J.; De Preter, K.; Speleman, F., Identification of  
17 a novel recurrent 1q42.2-1qter deletion in high risk MYCN single copy 11q deleted  
18 neuroblastomas. *Int J Cancer* **2012**, *130* (11), 2599-606.
- 19 70. Bateman, L. A.; Ku, W. M.; Heslin, M. J.; Contreras, C. M.; Skibola, C. F.; Nomura, D. K.,  
20 Argininosuccinate Synthase 1 is a Metabolic Regulator of Colorectal Cancer Pathogenicity.  
21 *ACS chemical biology* **2017**, *12* (4), 905-911.
- 22 71. Ashrafian, H.; O'Flaherty, L.; Adam, J.; Steeples, V.; Chung, Y. L.; East, P.; Vanharanta, S.;  
23 Lehtonen, H.; Nye, E.; Hatipoglu, E.; Miranda, M.; Howarth, K.; Shukla, D.; Troy, H.; Griffiths,  
24 J.; Spencer-Dene, B.; Yusuf, M.; Volpi, E.; Maxwell, P. H.; Stamp, G.; Poulson, R.; Pugh, C.  
25 W.; Costa, B.; Bardella, C.; Di Renzo, M. F.; Kotlikoff, M. I.; Launonen, V.; Aaltonen, L.; El-  
26 Bahrawy, M.; Tomlinson, I.; Pollard, P. J., Expression profiling in progressive stages of  
27 fumarate-hydratase deficiency: the contribution of metabolic changes to tumorigenesis.  
28 *Cancer Res* **2010**, *70* (22), 9153-65.
- 29 72. Dansen, T. B.; Smits, L. M.; van Triest, M. H.; de Keizer, P. L.; van Leenen, D.; Koerkamp,  
30 M. G.; Szybowska, A.; Meppelink, A.; Brenkman, A. B.; Yodoi, J.; Holstege, F. C.; Burgering,  
31 B. M., Redox-sensitive cysteines bridge p300/CBP-mediated acetylation and FoxO4 activity.  
32 *Nat Chem Biol* **2009**, *5* (9), 664-72.
- 33 73. Reddie, K. G.; Carroll, K. S., Expanding the functional diversity of proteins through cysteine  
34 oxidation. *Curr Opin Chem Biol* **2008**, *12* (6), 746-54.
- 35 74. Sudarshan, S.; Sourbier, C.; Kong, H. S.; Block, K.; Valera Romero, V. A.; Yang, Y.; Galindo,  
36 C.; Mollapour, M.; Scroggins, B.; Goode, N.; Lee, M. J.; Gourlay, C. W.; Trepel, J.; Linehan,  
37 W. M.; Neckers, L., Fumarate hydratase deficiency in renal cancer induces glycolytic  
38 addiction and hypoxia-inducible transcription factor 1 $\alpha$  stabilization by glucose-  
39 dependent generation of reactive oxygen species. *Mol Cell Biol* **2009**, *29* (15), 4080-90.
- 40 75. Li, R.; Kast, J., Biotin Switch Assays for Quantitation of Reversible Cysteine Oxidation.  
41 *Methods Enzymol* **2017**, *585*, 269-284.
- 42 76. Jost, M.; Weissman, J. S., CRISPR Approaches to Small Molecule Target Identification. *ACS*  
43 *chemical biology* **2018**, *13* (2), 366-375.
- 44 77. Candiano, G.; Bruschi, M.; Musante, L.; Santucci, L.; Ghiggeri, G. M.; Carnemolla, B.;  
45 Orecchia, P.; Zardi, L.; Righetti, P. G., Blue silver: a very sensitive colloidal Coomassie G-  
46 250 staining for proteome analysis. *Electrophoresis* **2004**, *25* (9), 1327-33.
- 47 78. Speers, A. E.; Cravatt, B. F., Profiling enzyme activities in vivo using click chemistry methods.  
48 *Chemistry & biology* **2004**, *11* (4), 535-46.
- 49 79. Montgomery, D. C.; Sorum, A. W.; Guasch, L.; Nicklaus, M. C.; Meier, J. L., Metabolic  
50 regulation of histone acetyltransferases by endogenous acyl-CoA cofactors. *Chemistry &*  
51 *biology* **2015**, *22*, 1030-9.

- 1 80. Qian, Y.; Martell, J.; Pace, N. J.; Ballard, T. E.; Johnson, D. S.; Weerapana, E., An isotopically  
2 tagged azobenzene-based cleavable linker for quantitative proteomics. . *ChemBioChem*  
3 **2013**, *14*, 1410-1414.
- 4 81. Weerapana, E.; Speers, A. E.; Cravatt, B. F., Tandem orthogonal proteolysis-activity-based  
5 protein profiling (TOP-ABPP)-a general method for mapping sites of probe modification in  
6 proteomes. . *Nat Protoc* **2007**, *2*, 1414-1425.
- 7 82. Speers, A. E.; Cravatt, B. F., A tandem orthogonal proteolysis strategy for high-content  
8 chemical proteomics. . *J Am Chem Soc* **2005**, *127*, 10018-10019.
- 9 83. Eng, J. K.; McCormack, A. L.; Yates, J. R., An approach to correlate tandem mass spectral  
10 data of peptides with amino acid sequences in a protein database. . *J Am Soc Mass Spec*  
11 **1994**, *5*, 976-989.
- 12 84. Tabb, D. L.; McDonald, W. H.; Yates, J. R., DTASelect and Contrast: tools for assembling  
13 and comparing protein identifications from shotgun proteomics. *J Proteom Res* **2002**, *1*, 21-  
14 26.
- 15 85. Martell, J.; Seo, Y.; Bak, D. W.; Kingsley, S. F.; Tissenbaum, H. A.; Weerapana, E., Global  
16 cysteine-reactivity profiling during impaired insulin/IGF-1 signaling in *C. elegans* identifies  
17 uncharacterized mediators of longevity. . *Cell Chem Biol* **2016**, *23*, 955-966.
- 18 86. Wang, X.; Spandidos, A.; Wang, H.; Seed, B., PrimerBank: a PCR primer database for  
19 quantitative gene expression analysis, 2012 update. *Nucleic Acids Res* **2012**, *40*, D1144-  
20 D1149.
- 21 87. Schmittgen, T. D.; Livak, K. J., Analyzing real-time PCR data by the comparative CT method.  
22 *Nat Protoc* **2008**, *3*, 1101-1108.  
23
